1  
2  
3  
4  
5  
6  
7  
8  
9  
10  
11  
12  
13  
14  
15  
16  
17  
18  
19  
20  
21  
22  
23  
24

**Translation of the ERM-1 membrane-binding domain directs *erm-1* mRNA localization to the plasma membrane in the *C. elegans* embryo**

Lindsay P. Winkenbach<sup>1</sup>, Dylan M. Parker<sup>1,2</sup>, Robert T. P. Williams<sup>1</sup>, Erin Osborne Nishimura<sup>1\*</sup>

<sup>1</sup>Department of Biochemistry and Molecular Biology, Colorado State University, Fort Collins, CO, USA

<sup>2</sup> Department of Chemistry and Biochemistry, Howard Hughes Medical Institute, University of Colorado, Boulder, CO, USA

\*Correspondence: [erin.nishimura@colostate.edu](mailto:erin.nishimura@colostate.edu)

25 **RUNNING TITLE:** *erm-1* mRNA localization in *C. elegans*

26 **KEYWORDS:** mRNA localization, *C. elegans*, *erm-1*, FERM domain, plasma membrane,  
27 translation

28 **SUMMARY STATEMENT**

29 In *C. elegans*, *erm-1* mRNA localization to plasma membranes requires translation of the ERM-  
30 1 membrane-binding domain

31

32 **ABSTRACT**

33 mRNA localization and transport are integral in regulating gene expression. In *Caenorhabditis*  
34 *elegans* embryos, the maternally inherited mRNA *erm-1* (*Ezrin/Radixin/Moesin*) concentrates in  
35 anterior blastomeres. *erm-1* mRNA localizes within those blastomeres to the plasma membrane  
36 where the essential ERM-1 protein, a membrane-actin linker, is also found. We demonstrate  
37 that the localization of *erm-1* mRNA to the plasma membrane is translation-dependent and  
38 requires its encoded N-terminal membrane-binding (FERM) domain. By perturbing translation  
39 through multiple methods, we found *erm-1* mRNA localization at the plasma membrane was  
40 maintained only if the nascent peptide remained in complex with the translating mRNA. Indeed,  
41 recoding the *erm-1* mRNA coding sequence while preserving the encoded amino acid sequence  
42 did not disrupt *erm-1* mRNA localization, corroborating that the information directing mRNA  
43 localization resides within its membrane-binding protein domain. A smiFISH screen of 17 genes  
44 encoding similar membrane-binding domains identified three plasma membrane localized  
45 mRNAs in the early embryo. Nine additional transcripts showed apparent membrane localization  
46 later in development. These findings point to a translation-dependent pathway for localization of  
47 mRNAs encoding membrane-associated proteins.

48

49

50

51

## 52 INTRODUCTION

53 mRNA localization is a prevalent feature in diverse cell types and organisms (Chouaib et al.,  
54 2020; Knowles et al., 1996; Lécuyer et al., 2007; Llopis et al., 2010; Long et al., 1997; Rebagliati  
55 et al., 1985). Subcellular localization of mRNA is associated with spatiotemporal control of gene  
56 expression. mRNA localization can occur as a cause or consequence of translational regulatory  
57 control, can promote mRNA degradation, facilitate interactions with effector proteins, and  
58 prevent premature non-specific interactions (Besse and Ephrussi, 2008; Broadus et al., 1998;  
59 Chouaib et al., 2020; Ephrussi et al., 1991; Frohnhofer and Nüsslein-Volhard, 1986; Ma and  
60 Mayr, 2018; Rebagliati et al., 1985; Ryder and Lerit, 2018; Sepulveda et al., 2018). In  
61 *Caenorhabditis elegans* early embryos, mRNA localization is a prominent feature of maternally  
62 inherited mRNAs and may contribute to cell-specific patterning prior to the onset of zygotic  
63 transcription (Aoki et al., 2021; Lee et al., 2020; Nishimura et al., 2015; Parker et al., 2020;  
64 Updike and Strome, 2010). Generally, maternal transcripts enriched in the posterior cells of the  
65 embryo localize to membraneless biomolecular condensates called P granules (Lee et al., 2020;  
66 Parker et al., 2020). Previous work has indicated that transcripts localize to P granules following  
67 translation repression (Lee et al., 2020; Parker et al., 2020). In contrast, maternal transcripts  
68 that concentrate in the anterior cells often localize to the plasma membrane (Parker et al., 2020)  
69 often colocalizing with their encoded proteins. However, the molecular mechanisms that  
70 facilitate membrane localization in *C. elegans* are unclear. Here we focus on *erm-1* as a model  
71 membrane-associated transcript and characterize the mechanisms underlying its localization to  
72 the cell membrane.

73 mRNA localization can occur via translation-independent or translation-dependent  
74 pathways (Johnston, 2005; Parton et al., 2014; Szostak and Gebauer, 2013). Translation-  
75 independent pathways typically rely on *cis*-acting elements, RNA sequences or structures that  
76 are often located in untranslated regions (UTRs) and recruit *trans*-recognition factors such as

77 RNA Binding Proteins (RBPs). Recognition by RBPs can lead to either passive or directed  
78 transport, often in association with other processes such as mRNA protection, mRNA  
79 degradation, or translational regulatory control (Engel et al., 2020). The result is an enrichment  
80 of mRNAs in specific subcellular locales. In *C. elegans*, some posterior-enriched maternal  
81 transcripts localize through translation-independent pathways, relying on *cis*-acting elements in  
82 their 3'UTRs to direct translational repression that is required for localization into P granules  
83 (Lee et al., 2020; Parker et al., 2020). In contrast, translation-dependent pathways of mRNA  
84 localization typically rely on peptide signals in the nascent polypeptide. Transcripts that  
85 concentrate at the ER often rely on signal peptides to direct translating mRNAs and their  
86 encoded proteins to their destinations (Walter and Johnson, 1994). However, previously  
87 identified transcripts that localize to the plasma membrane in *C. elegans* embryos lack a  
88 discernable signal peptide (Parker et al., 2020). Recently, several *C. elegans* transcripts that  
89 encode members of the apical junction sub-complexes, their additional ancillary proteins, or  
90 other cytoskeletal components were found to localize to the plasma membrane during mid-  
91 embryogenesis with subcellular localization patterns that did not appear to overlap with the  
92 endoplasmic reticulum. Of these, the *dlg-1* transcript was shown to localize in a translation-  
93 dependent fashion (Tocchini et al., 2021). Together, these findings demonstrate the localization  
94 of plasma membrane enriched transcripts is occurring in a distinct manner from the canonical,  
95 ER signal peptide directed pathway and that local translation may be a general feature of  
96 junction and membrane-linker proteins.

97 *erm-1* (*ezrin/radixin/moesin*) mRNA is the most anterior-enriched transcript in the 2-cell  
98 *C. elegans* embryo (Nishimura et al., 2015; Tintori et al., 2016). In addition to its high  
99 enrichment within anterior cells of the early embryo, *erm-1* mRNA concentrates at plasma  
100 membranes within those cells, a pattern coincident with its encoded ERM-1 protein (Furden et  
101 al., 2004; Göbel et al., 2004; Parker et al., 2020). Previously, we showed the *erm-1* 3'UTR was  
102 insufficient to direct membrane mRNA localization, indicating that the localization element



103 resides elsewhere in the RNA sequence or the encoded protein (Parker et al., 2020). In this  
104 study, we set out to identify which elements in *erm-1* mRNA or the encoded ERM-1 protein are  
105 necessary for membrane localization.

106 In *C. elegans*, ERM-1 is the sole ortholog of the conserved ERM protein family that  
107 serve as membrane-actin linkers (Furden et al., 2004). ERM proteins regulate cell morphology  
108 and signaling events at the plasma membrane. Therefore, they are prominent in processes such  
109 as epithelial junction remodeling, cell migration, promotion of microvilli formation, and  
110 interactions with actin at the cell cortex (Fehon et al., 2010; Furden et al., 2004; Göbel et al.,  
111 2004; McClatchey, 2014). Proper specialization of the cell cortex and plasma membrane is  
112 critical for controlling cell morphology, as evidenced by the fact that in *C. elegans*, loss of the  
113 *erm-1* in the intestine results in early embryo lethality due to constrictions and disjunctions in the  
114 intestinal lumen (Furden et al., 2004; Ramalho et al., 2020).

115 Here we demonstrate *erm-1* mRNA accumulation at the plasma membrane is  
116 translation-dependent and requires the membrane-binding ability of the FERM domain to enrich  
117 at the plasma membrane. Further, we screened 17 genes encoding similar membrane-binding  
118 FERM or PH-like domains. We identified twelve additional plasma membrane localized  
119 transcripts and other patterns of subcellular mRNA localization that change over developmental  
120 time. Our findings suggest translation of this conserved membrane binding domain is conducive  
121 to subcellular localization of both the mRNA and the encoded protein.

122

123

124

125

## 126 RESULTS

### 127 ***erm-1* mRNA localization to the plasma membrane requires translation initiation**

128 mRNA localization is directed through either translation-dependent or translation-independent  
129 pathways (Johnston, 2005; Parton et al., 2014; Szostak and Gebauer, 2013). To test which  
130 pathway was responsible for *erm-1* mRNA localization, we disrupted global translation by two  
131 methods and determined whether either perturbed *erm-1* mRNA accumulation at the  
132 membrane. We first depleted the translation initiation factor *ifg-1* (*Initiation Factor 4G (eIF4G)*  
133 *family*) by RNA interference (RNAi). IFG-1 is the sole *C. elegans* ortholog of eIF4G, and both  
134 cap-dependent and -independent translation initiation require IFG-1 (Berset et al., 1998; Kim et  
135 al., 2018; Ramírez-Valle et al., 2008; Rogers et al., 2011). Using a destabilized-GFP as a  
136 translation reporter (MODCPEST GFP::H2B), we found that *ifg-1* RNAi decreased translation in  
137 a partially penetrant fashion as indicated by a decrease in GFP::H2B fluorescence (Corish and  
138 Tyler-Smith, 1999; Kaymak et al., 2016; Li et al., 1998) (**Fig. 1A, C**). *ifg-1* RNAi introduced in the  
139 L2 stage of development led to 46% of 4-cell progeny exhibiting a significant loss of GFP signal  
140 and 54% showing no significant change compared to wild type. Importantly, we observed that  
141 embryos with impacted translation also experienced a loss of *erm-1* mRNA localization at the  
142 plasma membrane with high concordance (**Fig. 1A, C**). These results support the model that  
143 *erm-1* mRNA localization to the plasma membrane is translation-dependent.

144 As a complementary approach to disrupting global translation initiation via RNAi, we next  
145 disrupted translation through heat shock and quantified the resulting changes in *erm-1* mRNA  
146 enrichment at the plasma membrane (Parker et al., 2020). Heat shock prevents protein  
147 synthesis primarily through changes in phosphorylation states of translation initiation factors  
148 followed by their subsequent inactivation (Cuesta et al., 2000; Duncan and Hershey, 1984;  
149 Shalgi et al., 2013). Heat shock acts within a shorter time frame than *ifg-1* RNAi (25 minutes  
150 heat shock vs. 48 hrs RNAi exposure). In heat treated 4-cell embryos, we observed a 1.6-fold  
151 reduction in *erm-1* mRNA enrichment alongside the plasma membrane (at a distance of less

152 than 10% of the normalized radius from the plasma membrane) after only 25 minutes of 30 °C  
153 heat exposure compared to controls that were kept at 20 °C for the same duration (**Fig. 1B, D**).  
154 Combined with the *ifg-1* RNAi experiment findings, this illustrated that *erm-1* mRNA localization  
155 to the plasma membrane depended on translation-initiation for establishment and maintenance.  
156 Together, these results suggest a translation-dependent pathway and imply that the signal to  
157 localize *erm-1* mRNA to membranes may be an encoded peptide sequence in the nascent  
158 ERM-1 protein. However, these assays do not yield information on whether active translation or  
159 an intact ribosome nascent chain complex (RNC), or both, are required for localization.

160

### 161 **The ERM-1 nascent peptide is required for *erm-1* mRNA enrichment at plasma** 162 **membranes**

163 We identified that translation is required for *erm-1* mRNA enrichment at plasma membranes.  
164 This suggests a model in which the RNC – comprised of *erm-1* mRNA, the translating ribosome,  
165 and the emerging nascent ERM-1 protein – is transported to the plasma membrane together  
166 through recognition of amino acid sequences in the nascent ERM-1 protein. We hypothesize  
167 that *erm-1* mRNA localization requires intact RNCs, likely at steps that both establish and  
168 maintain localization. To test this hypothesis, we inhibited translation elongation using two  
169 different drugs, one that preserves RNCs (cycloheximide) and one that disrupts them  
170 (puromycin) (Azzam and Algranati, 1973; Schneider-Poetsch et al., 2010).

171 The eggshell and permeability barrier in the *C. elegans* embryo complicate drug  
172 treatment by limiting small molecule penetrance (Carvalho et al., 2011; Olson et al., 2012; Stein  
173 and Golden, 2015). To circumvent this, we disrupted the sugar modifying enzyme and  
174 permeability barrier protein PERM-1 by RNAi, thereby allowing ingress of small molecules  
175 such as cycloheximide and puromycin. Though *perm-1* RNAi eventually leads to lethality in late  
176 embryos, development in early embryonic stages proceeds typically (Carvalho et al., 2011).

177 Importantly, *perm-1* RNAi is compatible with both drug treatment and smFISH imaging of *erm-1*  
178 mRNA.

179 We observed that disruption of the RNC via puromycin treatment led to loss of *erm-1*  
180 mRNA localization at the membrane in 84% of embryos between the 2-cell and 8-cell stages  
181 (**Fig. 2A, B; Fig S1A, B**). In contrast, cycloheximide treatment, which stalls translation during  
182 elongation while preserving the RNC only altered *erm-1* mRNA localization in 4% of embryos  
183 surveyed (**Fig. 2A, B; Fig S1A, B**). This suggests that the *erm-1* mRNA must maintain  
184 association with the ribosome for *erm-1* mRNA molecules to maintain localization to plasma  
185 membranes upon translation disruption. Additionally, the maintenance of *erm-1* mRNA  
186 localization does not require ongoing translational elongation provided stalled RNCs are  
187 preserved intact, as is the case with cycloheximide treatment. These findings further support the  
188 translation-dependent model and suggest that *erm-1* mRNA transcripts localize through  
189 association with the RNC.

190

### 191 ***erm-1* mRNA localization to the plasma membrane does not depend on nucleic acid** 192 **sequences**

193 We have established that *erm-1* mRNA localizes to plasma membranes in a translation-  
194 dependent manner. However, *erm-1* mRNA can persist at membranes if the RNC remains intact  
195 when disrupting translation elongation. This suggests that localization is dependent on ERM-1  
196 amino-acid sequence and not *erm-1* mRNA sequence. Supporting this hypothesis, previous  
197 evidence has illustrated that the *erm-1* 3'UTR (typically a common site of *cis*-acting localization  
198 elements) is insufficient to direct mRNA to the membrane (Parker et al., 2020). To test whether  
199 other *erm-1* mRNA nucleotide sequences are dispensable for localization, we artificially re-  
200 coded the *erm-1* mRNA nucleotide sequence while preserving the amino acid sequence by  
201 capitalizing on the redundancy of the genetic code (**Fig S2A**). Our nucleotide recoded, yet  
202 amino-acid synonymous, *erm-1* sequence (called *erm-1 synon*) shares 64% identity at the

203 nucleic acid level with the wild-type *erm-1* sequence (called *erm-1*) while maintaining 100%  
204 identity of the amino acid sequence (**Fig. 3A; Fig S2B**). We designed single molecule  
205 inexpensive FISH (smiFISH) probes that could distinguish between the recoded, synonymous  
206 *erm-1* and wild-type sequences (**Fig. 3B, C**). Using these probes, we found the *erm-1* *synon*  
207 transcript retained enrichment at the plasma membrane with no significant difference between it  
208 and either the endogenous *erm-1* transcript (**Fig. 3B D**) or a matched transgenic wild-type *erm-*  
209 *1* sequence inserted at the same transgenic location (**Fig. S2D, C**). These data imply that RNA  
210 sequences within the *erm-1* transcript are dispensable for *erm-1* mRNA localization, and  
211 instead, localization elements reside in the translated ERM-1 protein.

### 212 ***erm-1* mRNA and ERM-1 protein localization require the ERM-1 PIP<sub>2</sub> membrane-binding** 213 **region**

214 To identify domains within the ERM-1 protein required to localize translating *erm-1* to plasma  
215 membranes, we examined *erm-1* mRNA localization upon mutations in key conserved ERM-1  
216 domains. Generally, ERM proteins are a conserved family defined by domains common to their  
217 founding members, Ezrin, Radixin, and Moesin (Bretscher, 1983; Lankes and Furthmayr, 1991;  
218 Tsukita et al., 1989). ERM proteins serve as structural linkers between the plasma membrane  
219 and the actin cytoskeleton and play central roles in cell morphology and signaling processes  
220 that converge on the plasma membrane. Two key domains coordinate their linker function. The  
221 N-terminal band 4.1 Ezrin/Radixin/Moesin (FERM) domain houses a PH-like (Pleckstrin  
222 Homology-like) domain that associates with the plasma membrane through interactions with  
223 PIP<sub>2</sub> (phosphatidylinositol (4,5) bisphosphate) (Barret et al., 2000; Fehon et al., 2010; Roch et  
224 al., 2010). In contrast, the C-terminal C-ERMAD domain interacts with the actin cytoskeleton in  
225 a phosphorylation-dependent manner (McClatchey, 2014; Ramalho et al., 2020). The FERM  
226 and C-ERMAD domains can also intramolecularly bind to prevent their respective substrate  
227 associations. A dephosphorylation event on the C-ERMAD domain increases intramolecular  
228 affinity thereby permitting the inactive form (Li et al., 2007; Pearson et al., 2000; Roch et al.,

229 2010). Therefore, the architecture of ERM-1 connects the plasma membrane and the actin  
230 cytoskeleton in a phosphorylation-dependent mechanism.

231 Mutating four lysines to asparagines abrogates the PIP<sub>2</sub> binding ability of the FERM  
232 domain (Barret et al., 2000; Roch et al., 2010) (**Fig. 4A**), termed the ERM-1[4KN]  
233 mutant (Ramalho et al., 2020). In *C. elegans*, this leads to intestinal lumen cysts and  
234 disjunctions as well as early larval lethality that phenocopy the *erm-1* null (Göbel et al., 2004;  
235 Ramalho et al., 2020). In contrast, mutating the conserved, phosphorylatable residue T544 to  
236 alanine (ERM-1[T544A]) disrupts the function of the C-ERMAD domain, thereby rendering C-  
237 ERMAD non-phosphorylatable (Carreno et al., 2008; Zhang et al., 2020). In *C. elegans*, this  
238 leads to disrupted cortical actin organization and reduced apical localization of ERM-1 (Ramalho  
239 et al., 2020). We assessed *erm-1* mRNA localization in these two previously characterized  
240 mutant strains to determine whether *erm-1* mRNA accumulation at the plasma membrane  
241 requires the FERM or C-ERMAD domains.

242 Because the ERM-1[T544A] and ERM[4KN] mutant strains were extensively studied in  
243 previous reports during mid-stage embryogenesis for their impacts on intestinal development  
244 (Ramalho et al., 2020), we examined *erm-1* mRNA localization at both the 4-cell stage we have  
245 previously studied and at mid-stage embryogenesis. These assays were performed in ERM-  
246 1[T544A] homozygous mutants with no wild-type ERM-1 in the background. In 4-cell stage  
247 embryos, both *erm-1*[T544A] mRNA and ERM-1[T544A] protein localized to the plasma  
248 membranes similar to wild-type (**Fig. 4B**). However, the mutants exhibited plasma membranes  
249 with “ruffled” or distorted phenotypes, indicating that loss of this phospho-moiety imparts a  
250 cellular phenotype through its previously reported reduction in actin organization (**Fig. 4B**)  
251 (Ramalho et al., 2020). In 2.5-fold embryos, *erm-1*[T544A] mRNA also localized at the plasma  
252 membrane, similar to wild-type strains. In these embryos, the ERM-1[T544A] protein displayed  
253 increased basolateral localization in the intestinal lumen, as has been previously reported (**Fig.**  
254 **4B**) (Ramalho et al., 2020). Therefore, the T544A mutant, though disruptive of ERM-1

255 phosphorylation and actin association, was not sufficient to disrupt *erm-1* mRNA localization to  
256 the plasma membrane at these stages.

257 Mutations in ERM-1 that disrupt FERM domain/PIP<sub>2</sub> interactions (called ERM-1[4KN])  
258 reduce (in the intestine and excretory canal) or eliminate (in progenitor germ cells and seam  
259 cells) ERM-1[4KN] protein localization to apical membranes (Ramalho et al., 2020). We  
260 performed smFISH on 4-cell and 2.5-fold stage ERM-1[4KN] homozygous mutant embryos  
261 lacking any ERM-1 wild-type copies to assess how this mutation impacted *erm-1* mRNA  
262 localization (**Fig. 4A; Fig S3A, B**). At the 4-cell stage, *erm-1[4KN]* mRNA failed to localize to the  
263 plasma membrane in 100% of embryos surveyed (**Fig. 4B**). However, the number of *erm-1*  
264 mRNA molecules detected did not significantly change between *erm-1 wt* and *erm-1[4KN]* (**Fig.**  
265 **4C**). ERM-1[4KN] protein enrichment at the plasma membrane was also abolished. RNA  
266 localization was not observed at the 2.5-fold stage and protein localization was reduced,  
267 displaying disjunctions in the lumen as previously reported (Ramalho et al., 2020). Thus, the  
268 FERM-domain was required to localize both the *erm-1* mRNA and the ERM-1 protein to the  
269 plasma membrane. Combined with our previous findings, this indicates that the peptide signal  
270 required to localize the ERM-1 RNC, including its associated mRNA, resides within the FERM  
271 domain of the nascent peptide.

272

### 273 **Genes encoding FERM and PH-like domains are conducive for mRNAs with localization** 274 **at the plasma membrane**

275 Given that PIP<sub>2</sub>-binding FERM domains have a high affinity for membranes (Senju et al., 2017),  
276 their ability to direct membrane-localized mRNA transcripts may be generalizable. Evidence for  
277 this exists in other systems: In early *Drosophila* embryogenesis, the PIP<sub>2</sub>-binding PH domain  
278 and actin-binding domains of the Anillin protein are required to localize *anillin* mRNA to  
279 pseudocleavage furrow membranes (Hirashima et al., 2018). Based on the findings from the



280 ERM-1[4KN]::GFP mutant strain, we hypothesized that the PIP<sub>2</sub>-binding element of the FERM  
281 domain could be a general predictor of transcripts that enrich at cell membranes.

282 To test our hypothesis, we conducted a smiFISH-based screen in *C. elegans* early  
283 embryos for membrane localization of other PIP<sub>2</sub>-binding FERM or PH-like domain containing  
284 transcripts (Nishimura et al., 2015; Tintori et al., 2016). A total of 17 transcripts (9 with FERM  
285 domains and 8 with PH-like domains) were selected for visualization based on their expression  
286 in early embryos and with preference given to homology in other organisms (**Table 1; Fig S6;**  
287 **Fig S7; Materials and Methods**). The set of transcripts selected comprised those that enriched  
288 to anterior embryonic cells, posterior embryonic cells, and those with ubiquitous distribution  
289 across the early embryo.

290 Of the 17 screened transcripts, three (*frm-4*, *frm-7*, *ani-1*) displayed clear membrane  
291 localization in early embryos at the 4-cell stage (**Fig. 5A, B; Fig. S4A-C**). Seven transcripts  
292 displayed clustered subcellular patterning in the posterior cell (*Y41E3.7*, *unc-112*, *mrck-1*, *wsp-*  
293 *1*, *ani-2*, *dyn-1*, and *exoc-8*) (**Fig. S4C**). Four transcripts displayed uniform distribution or other  
294 patterns (*F07C6.4*, *efa-6*, *mtm-1*, and *let-502*) (**Fig. S4A**). Three transcripts (*frm-2*, *nfm-1*, and  
295 *ptp-1*) yielded RNA abundance too low to determine subcellular enrichment (**Table 1; Fig. S4B**).

296 Notably, all transcripts previously reported as posterior-cell enriched (Nishimura et al.,  
297 2015; Tintori et al., 2016) exhibited clustered patterning in early embryos (**Table 1; Fig. S4C**).  
298 This is consistent with prior visualizations of posterior-enriched transcripts at the 4-cell stage  
299 that often concentrate within P granules (Parker et al., 2020). Of the transcripts that were  
300 uniformly distributed between the anterior and posterior cells (as assayed by RNA-seq), those  
301 with posterior-enrichment below the significance cut-off (*Y43E3.7*, *mrck-1*, *wsp-1*) also  
302 displayed clustered patterning (**Table 1; Fig. S4C**). Overall, these results support previous  
303 findings in the early embryo that AB-cell enriched transcripts tend to localize to membranes,  
304 whereas P<sub>1</sub>-enriched transcripts tend to localize to P granules, membraneless organelles  
305 housing lowly translated mRNAs (Lee et al., 2020; Parker et al., 2020; Updike and Strome,



306 2010). To determine whether clustered transcripts were indeed localizing to P granules or  
307 membranes, smFISH was conducted in a P granule or membrane marker strain, respectively.  
308 Indeed, even in the case of the homologs *ani-1* and *ani-2*, the anterior-enriched *ani-1* mRNA  
309 was membrane localized, whereas the posterior-enriched *ani-2* mRNA localized to P granules  
310 (**Fig. 5A**). Importantly, ANI-1 protein is translated in early embryos and concentrates at the  
311 plasma membrane while early embryo expression of ANI-2 protein is not detected (Maddox et  
312 al., 2005). Together, these results suggest that translational dependence of plasma membrane  
313 mRNA localization is not limited to *erm-1*.

314 Our visual screen found that subcellular localization patterns of some transcripts  
315 changed over developmental time. At the 4-cell stage, *unc-112* mRNA clustered in the P-lineage  
316 in P granules (**Fig. 5A**). However, later in embryonic development, at the 3-fold stage, *unc-112*  
317 mRNA localized along the body wall where the encoded UNC-112 protein reportedly functions  
318 (**Fig. S5A**) (Rogalski et al., 2000). At the 4-cell stage, *F07C6.4* mRNA had uniform distribution  
319 (**Fig. 5A**), but at the 100-cell stage it localized to the plasma membranes of a subset of discrete  
320 cells (**Fig. S5B**). Similarly, at the 4-cell stage *let-502* had uniform localization (**Fig. S4B**), but at  
321 the 1.5-fold stage it was localized to adherens junctions where the encoded LET-502 protein  
322 localizes and functions (**Fig. S5C**) (Piekny et al., 2003). While the *ani-2* transcript clustered in P  
323 granules at the 4-cell stage (**Fig. 5A**), at the bean stage *ani-2* was excluded from P granules  
324 and found at the interface of the primordial germ cells where ANI-2 functions in maintaining the  
325 structure of the syncytial compartment of germline cytoplasm at the membrane (Maddox et al.,  
326 2005) (**Fig. S5D**). Overall, 9 of the surveyed transcripts without observable membrane  
327 localization at the 4-cell stage (*F07C6.4*, *frm-2*, *nfm-1*, *ptp-1*, *unc-112*, *efa-6*, *mtm-1*, *let-502*,  
328 *ani-2*, and *dyn-1*) displayed cortical localization at later stages of development, frequently  
329 coinciding with where their encoded proteins function (Hunt-Newbury et al., 2007; Josephson et  
330 al., 2017; Maddox et al., 2005; Piekny et al., 2003; Rogalski et al., 2000; Thompson et al., 2002;

331 Uchida et al., 2002; Zou et al., 2009). These findings suggest subcellular patterning is  
332 developmentally dynamic.

333 By conducting a visual screen on a subset of FERM and PH-like domain containing  
334 transcripts, we identified additional transcripts that enrich at membranes, adding to the small but  
335 growing list of transcripts with this behavior in *C. elegans* (Parker et al., 2020; Tocchini et al.,  
336 2021). 12 out of the 17 (70%) FERM and PH-like domain containing transcripts we surveyed  
337 exhibited membrane localization at some stage during development. These findings illustrate  
338 that translated mRNAs encoding PIP<sub>2</sub>-binding domains often localize to plasma membranes and  
339 suggests that they may locally translated at the sites where their proteins are required.  
340 Furthermore, results from this screen reinforce the trend that transcripts concentrated within the  
341 P lineage in the early embryo are lowly translated and display clustered patterning, likely within  
342 P granules.

343

## 344 **DISCUSSION**

345 Here, we report that *C. elegans erm-1* mRNA is localized to the plasma membrane in a  
346 translation-dependent manner during early embryonic development (**Fig. 6**). We showed that in  
347 the absence of active translation, an intact ribosome-nascent chain complex (RNC) was  
348 required to maintain *erm-1* mRNA localization. We also demonstrated that 36% of the *erm-1*  
349 mRNA sequence could be altered but the transcript would still localize properly provided the  
350 ERM-1 protein sequence was preserved. This finding further suggests that the localization  
351 determinant is specified in the nascent chain of the ERM-1 protein, not as a *cis*-acting element  
352 in the mRNA sequence or structure. Furthermore, we narrowed down a domain required for  
353 localization and determined it resided within the FERM domain and depended on that domain's  
354 ability to bind PIP<sub>2</sub>. We identified 3 additional FERM or PH-like domain encoding genes (*frm-7*,  
355 *frm-4*, and *ani-1*) with mRNA localization at the plasma membrane in the early embryo by a  
356 smiFISH visual screen and an additional 9 genes with mRNA localization later in development.

357 Our data indicate subcellular localization is a generalizable feature of transcripts encoding  
358 FERM or PH-like domains.

359 Complementarily to our findings in the early embryos, recent studies of later  
360 developmental stages identified 8 transcripts (*dlg-1*, *ajm-1*, *sma-1*, *vab-10a*, *erm-1*, *pgp-1*,  
361 *magu-2*, and *let-413*), including *erm-1*, that enrich to regions of the plasma membrane adjacent  
362 to apical junctions (Li et al., 2021; Tocchini et al., 2021). In particular, *dlg-1* mRNA localizes  
363 through a translation-dependent pathway (Tocchini et al., 2021). *dlg-1* localization requires the  
364 translation of N-terminal L27-PDZ domains, C-terminal SH3, Hook, and Guk domains to fully  
365 recapitulate the localization patterns of the *dlg-1* mRNA. These data, in combination with our  
366 findings, suggest translation-dependent localization could be a prevalent feature of mRNA that  
367 generally encode apical junction components or membrane associated proteins.

368 An outstanding question is whether *erm-1* mRNA localization is critical for ERM-1  
369 function. The ERM-1[4KN] mutation yields *erm-1* mRNA and ERM-1 protein that are mis-  
370 localized and results in lethality. However, the localization of the mRNA and protein are  
371 confounded, and it is difficult to test whether the proper localization of *erm-1* mRNA is required.  
372 Do ERM-1 proteins need to be locally translated at the plasma membrane for proper function?  
373 Because ERM proteins link the plasma membrane and actin cytoskeleton, ERM proteins often  
374 function in cell movement, membrane trafficking, cell signaling, and cell adhesion. They  
375 contribute to cancer-associated processes such as cell metastasis and chemotherapy  
376 resistance (Fehon et al., 2010; Kobori et al., 2021; McClatchey, 2003). Local translation of  
377 ERM-1 could be important for producing ERM-1 linker proteins at the exact sites and at the  
378 exact concentrations in which they are needed. This process could be responsive to signaling,  
379 polarity, or stability cues. Indeed, during embryonic development, the landscape of the plasma  
380 membrane is constantly changing and coordination between cell membrane and actin  
381 cytoskeletal structures are of paramount importance to cell morphology and cell migration

382 processes. Therefore, local translation of ERM-1 could be sensitive to incoming signals or  
383 developmental needs.

384 As an example of this concept, the protein PCNT (Pericentrin) in human cells and  
385 zebrafish embryos is shown to cotranslationally localize to dividing centrosomes during early  
386 mitosis (Sepulveda et al., 2018). This is hypothesized to supply sufficient PCNT protein where it  
387 is expeditiously needed for cell division and to mitigate the kinetic challenge of trafficking a large  
388 protein. Alternatively, some proteins are locally translated to promote proper folding, facilitate  
389 interactions with effector proteins, or to promote their ultimate integration into membranes or  
390 vesicles (Das et al., 2021). We postulate another idea, that local translation may temporarily  
391 stabilize ERM associations at membranes until phosphorylation in the C-terminal domain can  
392 facilitate actin binding. By this logic, ERM proteins could be translated in an “ON” state, ready to  
393 perform their function.

394 What pathways localize translationally competent *erm-1* transcripts to the plasma  
395 membrane in the early embryo? The pathway that directs (transmembrane protein and  
396 secretory protein encoding) mRNAs to the ER is the most well-characterized translation-  
397 dependent mRNA trafficking pathway and requires the presence of a signal peptide. As ERM-1  
398 lacks a discernable ER-directing signal peptide and fails to pull down ER associated-  
399 components in IP assays, we surmise the pathway that directs translating *erm-1* to the plasma  
400 membrane is likely distinct from the ER secretory pathway (Ast et al., 2013; Cohen et al., 2020;  
401 Keenan et al., 2001). Alternatively, if *erm-1* is localized in an ER-dependent pathway it would  
402 likely be noncanonical.

403 Future studies will determine the machinery required to traffic *erm-1*, and transcripts like  
404 it. A recent study live-imaging *erm-1* mRNA movements reported reduced *erm-1* enrichment at  
405 the membrane upon knocking down a dynein motor (DHC-1), suggesting *erm-1* localization  
406 could require this component of cytoskeletal trafficking (Li et al., 2021). It will also be interesting

407 to determine whether *erm-1* translation is paused or active during the trafficking process and  
408 whether multiple rounds of translation occur at the membrane.

409 Our screen of FERM and PH-like domain containing genes yielded multiple transcripts  
410 with mRNA localization at the plasma membrane suggesting this property is conserved across  
411 species. The *ani-1* and *ani-2* ortholog in *Drosophila*, *anillin*, concentrates at the pseudo-  
412 cleavage furrow of *Drosophila* embryos dependent on translation of both its PH and actin  
413 binding domains (Hirashima et al., 2018). (Lee et al., 2020; Parker et al., 2020) Indeed, the  
414 expanded use of mRNA imaging and sub-cellularly enriched RNA-seq technologies has led to a  
415 greater appreciation that localization of mRNA is a widespread feature of cell biology, not only to  
416 the plasma membrane but to a wide diversity of membranes and other subcellular structures  
417 (Chouaib et al., 2020; Safieddine et al., 2021). These findings suggest that many proteins may  
418 benefit from local translation at their destination site.

419

## 420 **MATERIALS AND METHODS**

### 421 **Worm husbandry**

422 *C. elegans* strains were cultured according to standard methods (Brenner, 1974). Worm strains  
423 were maintained and grown at 20°C on nematode growth medium (NGM: 3 g/L NaCl; 17 g/L  
424 agar; 2.5 g/L peptone; 5 mg/L cholesterol; 1mM MgSO<sub>4</sub>; 2.7 g/L KH<sub>2</sub>PO<sub>4</sub>; 0.89 g/L K<sub>2</sub>HPO<sub>4</sub>).  
425 Strains used in this study are listed in **(Table S1)**.

426

### 427 **Heat Shock Experiments**

428 Heat shock experiments were performed by transferring harvested embryos to pre-warmed M9  
429 liquid media and incubating at 30°C for 25 minutes. After heat shock, worms were immediately  
430 fixed for smFISH.

431

### 432 **RNAi Feeding for smFISH Microscopy**

433 RNAi feeding constructs were obtained from the Ahringer library (Fraser et al., 2000). Bacteria  
434 containing inducible dsRNA vectors were grown at 37°C in LB + ampicillin (100 µg/mL) media  
435 for 16 hr, spun down and resuspended at 10X original concentration with M9, plated on NGM +  
436 Carbenicillin (100 µg/mL) + IPTG (1 mM) plates, and grown at room temperature overnight, or  
437 until plates were dry. Embryos were harvested for synchronization from mixed staged worms.  
438 Harvested embryos were incubated in M9 for 24 hrs at RT while nutating until all arrived at L1  
439 developmental stage. L1 worms were deposited on RNAi feeding plates and grown at 20°C for  
440 48 hrs. Embryos were harvested from gravid adults and smFISH was conducted. For each gene  
441 targeted by RNAi, we performed at least three independent replicates. L4440 RNAi empty  
442 vector was used as a negative control and *pop-1* RNAi used as an embryonic lethal positive  
443 control. For experiments performing *ifg-1* RNAi, synchronized L1 worms were grown to L2 on  
444 OP50 plates before being washed in M9 and transferred to RNAi plates for 48 hrs. *E. coli* strains  
445 used in this study can be found in (**Table S2**).

446

#### 447 **Permeabilization and drug delivery**

448 For small molecule inhibitor experiments, *perm-1* RNAi was performed to permeabilize the  
449 eggshell as described in (Carvalho et al., 2011). Briefly, synchronized L1 worms were fed on  
450 RNAi for 48 hrs and embryos were hand-dissected from the treated mothers. Permeabilization  
451 by *perm-1* RNAi was tested by submerging embryos in water to induce bursting from to  
452 increased internal osmotic pressure. Additionally, RNAi efficacy was confirmed by *pop-1* RNAi  
453 positive control. To harvest embryos, young adult worms were washed off plates in 5ml S-buffer  
454 (129 mL 0.05 M K<sub>2</sub>HPO<sub>4</sub>; 871 mL 0.05 M KH<sub>2</sub>PO<sub>4</sub>; 5.85 g NaCl' 300 +/- 5 mOsm) and allowed to  
455 settle to the bottom of a 15 ml conical (no longer than 5min). S buffer was removed, and worms  
456 were resuspended in 100 µl S-buffer alone (negative control) or drug diluted in 100 µl S-buffer  
457 (500 µg/mL Cycloheximide and 100µg/mL Puromycin final concentrations). The 100 µl drug  
458 solution and young adult worms were transferred to a concavity slide, hand dissected in a

459 concavity slide, transferred to a 1.5 mL Eppendorf tube and incubated for 20 min. After  
460 incubation with drug solution, 1 mL of -20°C methanol was added to fix the embryos. Embryos  
461 were freeze-cracked in liquid nitrogen for 1 min then incubated overnight in methanol at -20°C to  
462 continue the fixation. smFISH was performed as described. Due to the fragility of *perm-1*  
463 depleted embryos, all spins required in their smFISH preparation were performed at 250 rcf  
464 instead of 2000 rcf.

465

#### 466 **smFISH**

467 single molecule Fluorescence *In Situ* Hybridization (smFISH) was performed based on the  
468 TurboFish protocol (Femino et al., 1998; Nishimura et al., 2015; Parker et al., 2021; Raj and  
469 Tyagi, 2010; Raj et al., 2008; Shaffer et al., 2013). Updates specific to *C. elegans* were made  
470 using new Biosearch reagents and outlined in (Parker et al., 2021). Using the Stellaris RNA  
471 FISH Probe Designer, custom FISH probes were designed for transcripts of interest (Parker et  
472 al., 2020; Parker et al., 2021) (Biosearch Technologies, Inc., Petaluma, CA) available online at  
473 [www.biosearchtech.com/stellarisdesigner](http://www.biosearchtech.com/stellarisdesigner) (version 4.2). Embryos were hybridized with Stellaris  
474 RNA FISH Probe sets labeled with CalFluor 610 or Quasar 670 (Biosearch Technologies, Inc.),  
475 following the manufacturer's instructions available online at  
476 [www.biosearchtech.com/stellarisprotocols](http://www.biosearchtech.com/stellarisprotocols). Briefly, adult worms were bleached for embryos,  
477 suspended in 1 ml -20°C methanol, freeze cracked in liquid nitrogen for 1 min, and fixed  
478 overnight in methanol at -20°C for 1-24 hours. Alternatively, fixation was done at 4 min  
479 incubation following the 1 min freeze crack, switching to -20°C acetone incubation for an  
480 additional 5 min. ERM-1::GFP worms were freeze-cracked in 1 mL acetone followed by a 35  
481 min incubation at -20°C. After fixation, embryos incubated in Stellaris Wash Buffer A for 5min at  
482 RT (Biosearch, SMF-WA1-60) before hybridization in 100 µl Stellaris Hybridization buffer  
483 [(Biosearch, SMF-HB1-10) containing 50 pmols of each primer set (up to two channels per  
484 experiment) and 10% formamide] 16-48 hrs at 37°C mixing at 400 rpm in a thermomixer



485 (Eppendorf ThermoMixer F1.5). Embryos were washed for 30 min in Stellaris Wash Buffer A,  
486 followed by a second wash of Stellaris Wash Buffer A containing 5 µg/ml of DAPI, then 5 min in  
487 Wash Buffer B followed by a second 5 min wash (Biosearch, SMF-WB1-20) before incubation in  
488 N-propyl gallate antifade (10 mL 100% glycerol, 100 mg N-propyl gallate, 400 µL 1M Tris pH  
489 8.0, 9.6 mL DEPC treated H<sub>2</sub>O) prior to slide preparation. All embryos were centrifuged in spin  
490 steps at 2,000 rcf unless otherwise noted. Embryos were mounted using equal volumes  
491 hybridized embryos resuspended in N-propyl gallate antifade and Vectashield antifade (Vector  
492 Laboratories, H-1000). smFISH image stacks were acquired as described in Parker et al., 2020.  
493 on a Photometrics Cool Snap HQ2 camera using a DeltaVision Elite inverted microscope (GE  
494 Healthcare), with an Olympus PLAN APO 60X (1.42 NA, PLAPON60XOSC2) objective, an  
495 Insight SSI 7-Color Solid State Light Engine, and SoftWorx software (Applied Precision) using  
496 0.2 µm z-stacks. Deltavision (SoftWorx) deconvolution software was applied for representative  
497 images. Images were further processed using FIJI (Schindelin et al., 2012). For each condition  
498 described a minimum of 5 embryos per 4-cell stage, but often many more across multiple cell  
499 stages, were imaged. All smFISH and smiFISH probes can be found in (**Table S3**). All raw  
500 microscopy images are deposited on Mountain Scholar, a digital, open access data repository  
501 associated with Colorado State University Libraries:

502

### 503 **smiFISH**

504 single molecule inexpensive Fluorescence *In Situ* Hybridization (smFISH) was performed as  
505 described in (Parker et al., 2021). Briefly, custom primary DNA oligos were designed as  
506 described (Tsanov et al., 2016) complementary to the 17 FERM and PH-like domain containing  
507 transcripts screened and ordered from IDT ([https://www.idtdna.com/pages/products/custom-](https://www.idtdna.com/pages/products/custom-dna-rna/dna-oligos)  
508 [dna-rna/dna-oligos](https://www.idtdna.com/pages/products/custom-dna-rna/dna-oligos)) (**Table S3**). Secondary FLAPX probes were ordered with dual 5' and 3'  
509 fluorophore labeling, Cal Fluor 610 or Quasar 670, from Stellaris LGC (Biosearch Technologies,  
510 BNS-5082 and FC-1065, respectively). Secondary, fluorophore labeled probes were annealed



511 to primary probes fresh for every experiment in a thermocycler at 85°C for 3 min, 65°C for 3  
512 min, and 25°C for 5 min.

513

#### 514 **Quantification of plasma membrane RNA localization**

515 Quantification of transcript localization with reference to the cell membrane was performed as  
516 previously described (Parker et al., 2020) using the web application ImJoy (Ouyang et al.,  
517 2019). Briefly, RNAs were first detected from raw images using the Matlab code FISH-quant  
518 (Mueller et al., 2013). Individual cell outlines were then manually annotated in FIJI for each Z-  
519 stack in the micrograph, excluding the uppermost and lowermost stacks where cells are  
520 flattened against the slide or coverslip or there is out-of-focus light. The distance of each RNA  
521 was then measured from the nearest annotated membrane and binned in 10% distance  
522 increments away from nearest membrane to account for change in size between embryos. Total  
523 number of RNAs per bin were then normalized by the volume of the concentric areas they  
524 occupied. After this normalization, values larger than 1 indicate that for this distance more RNAs  
525 are found compared to a randomly distributed sample.

526

#### 527 **Quantification of total mRNA**

528 Detection of RNA molecules was performed in the 3D image stacks with FISH-quant (Mueller et  
529 al., 2013). Post-processing to calculate the different location metrics was performed as  
530 described above with custom written Matlab and Python code. The Python code is implemented  
531 in user-friendly plugins for the image processing platform ImJoy (Ouyang et al., 2019). Source  
532 code and all scripts used for analysis and figure generation are available here

533 <https://github.com/muellerflorian/parker-rna-loc-elegans>

534

535 To quantify the number of individual mRNAs in the ERM-1[4KN] strain a custom MATLAB script  
536 was implemented. FISH-quant detection settings were used to identify candidate mRNA clusters

537 from smFISH micrographs using a Gaussian Mixture Model (GMM). The GMM differentiates  
538 independent, single mRNAs from groups of clustered mRNAs by probabilistically fitting a  
539 predicted RNA of average intensity and size over each FISH-quant detected RNA.

540

#### 541 **Domain search**

542 A smiFISH-based screen was utilized to identify if transcripts with protein domains similar  
543 to *erm-1* also displayed membrane localization. WormBase ParaSite was utilized to generate a  
544 list of proteins with domain IDs matching those annotated for ERM-1. Proteins with domain IDs  
545 matching ERM-1 were subset for genes present in 2-cell stage embryos (Nishimura et al.,  
546 2015). This resulted in a list of 149 maternally inherited genes encoding either a FERM or PH-  
547 like domain. (**Table S4**).

548

549 Candidate genes were further subset using the “Interactive visualizer of differential gene  
550 expression in the early *C. elegans* embryo” (<http://tintori.bio.unc.edu/>, Tintori et al., 2017).

551 Candidate genes were manually curated based on the following criteria: 1) persistence of  
552 enrichment in the 4-cell stage embryo, 2) high transcript abundance in the 4-cell stage embryo,  
553 3) homology to genes encoding transcripts with known localization in other biological systems,  
554 and 4) existing protein expression data available on Wormbase (<https://wormbase.org/>) (**Table**  
555 **S5**). Manual curation resulted in 17 candidate genes that are simultaneously maternally  
556 inherited and contain FERM or PH-like domains to screen for membrane localization (**Table 1**).

557

558 **ACKNOWLEDGEMENTS**

559 We are grateful to Michael Boxem, Susan Mango, Cristina Tocchini, Brooke Montgomery, Tai  
560 Montgomery, Jessical Hill, and WormBase for reagents, protocols, equipment, advice,  
561 productive discussion, and critical feedback on the manuscript. This work utilized resources  
562 from the University of Colorado Boulder Research Computing Group, which is supported by the  
563 National Science Foundation (awards ACI-1532235 and ACI-1532236), the University of  
564 Colorado Boulder, and Colorado State University. This work utilized microscopy resources from  
565 NIH grant 1S10 OD025127 and support from the CSU Microscope Imaging Network. Some  
566 strains were provided by the Caenorhabditis Genetics Center, which is funded by National  
567 Institutes of Health Office of Research Infrastructure Programs (P40 OD010440). Some figure  
568 elements were created in BioRender.

569

570 **COMPETING INTERESTS**

571 The authors have no competing interests

572

573 **FUNDING**

| 574 <b>Funder</b>                                    | <b>Grant reference number</b> | <b>Author</b>          |
|------------------------------------------------------|-------------------------------|------------------------|
| 575 National Institutes of Health                    | R35GM124877                   | Erin Osborne Nishimura |
| 576 NSF MCB CAREER                                   | 2143849                       | Erin Osborne Nishimura |
| 577 NSF GAUSSI training grant                        | DGE-1450032                   | Lindsay Winkenbach     |
| 578 NSF GAUSSI training grant                        | DGE-1450032                   | Dylan Parker           |
| 579 Bridge to Doctorate at Colorado State University | 1612513                       | Robert Williams        |

580

581

582 **AUTHOR ORCIDS**

583 Lindsay P. Winkenbach <https://orcid.org/0000-0002-1766-3260>

584 Dylan M. Parker <https://orcid.org/0000-0002-4910-4113>  
585 Robert T.P. Williams <https://orcid.org/0000-0002-3384-212X>  
586 Erin Osborne Nishimura <https://orcid.org/0000-0002-4313-4573>  
587

588 **FIGURE LEGENDS**

589 **Figure 1: Disruption of global translation leads to loss of *erm-1* mRNA localized to the**  
590 **membrane. (A)** Fluorescent micrographs of 4-cell stage *C. elegans* embryos. RNAi was  
591 performed to deplete the translational initiation factor *ifg-1*, or an empty vector RNAi control was  
592 performed. *erm-1* transcripts were imaged by smFISH. In the same embryos, GFP from a  
593 translational reporter transgene (MODCPEST-GFP::H2B) and DNA (DAPI) were also imaged.  
594 Representative images are shown from a total of 102 4-cell stage embryos surveyed ( $n = 23$   
595 RNAi control,  $n = 79$  *ifg-1* RNAi [ $n = 43$  reporter signal retained,  $n = 36$  reporter signal  
596 depleted]). Scale bars are 10  $\mu\text{m}$ . **(B)** 4-cell stage *C. elegans* embryos harboring a membrane  
597 marker transgene (PH::GFP, green) were imaged for *erm-1* transcripts by smFISH (magenta)  
598 under no heat shock (control 20°C) and heat stress conditions (25 minutes at 30°C heat shock).  
599 DNA was also imaged as DAPI staining (blue). Scale bars are 10  $\mu\text{m}$ . **(C)** Quantification of  
600 translation reporter fluorescence under RNAi control ( $n = 6$ ), *ifg-1* RNAi *erm-1* localization  
601 retained ( $n = 6$ ), *ifg-1* RNAi *erm-1* localization lost ( $n = 6$ ) conditions. Background subtracted  
602 GFP intensities were measured as relative fluorescent units (RFU) using nuclear masks  
603 generated using DAPI. *erm-1* mRNA localization was assessed qualitatively as localized or  
604 unlocalized in 4-cell embryos. Significance indicates *P*-values derived from Welch Two  
605 Sample *t*-tests comparing the RFU values for localized versus unlocalized for the transcript *erm-*  
606 *1* at the given condition. P value legend: 0.00005>\*\*\*\***(D)** Quantification of *erm-1* mRNA under  
607 control (a representative set of  $n=5$ ) and heat shock conditions (a representative set of  $n=7$ )  
608 indicating the normalized frequency of *erm-1* mRNA at increasing, normalized distances from  
609 the cell periphery. Significance indicates *P*-values derived from Welch Two Sample *t*-tests  
610 comparing the cell membrane localization for heat shock versus control for the transcript *erm-1*  
611 at the given stage. *P* value legend: \*\*\*>0.00005  
612  
613

614 **Figure 2: The intact ERM-1 ribosome nascent chain complex (RNC) is required for *erm-1***  
615 **mRNA enrichment at cell membranes. (A)** Fluorescent micrographs of 4-cell stage *C. elegans*  
616 embryos are shown in which embryos were permeabilized by *perm-1* RNAi and subsequently  
617 treated with small molecule translation inhibitors, in comparison to RNAi and drug treatment  
618 controls. *erm-1* mRNA (green) was imaged by smFISH, under control, cycloheximide (500  
619  $\mu\text{g}/\text{mL}$ , 20min), or puromycin (500  $\mu\text{g}/\text{mL}$ , 20min) treatment conditions. Scale bars 10  $\mu\text{m}$ . **(B)**  
620 Bar plot indicating the proportion of embryos displaying *erm-1* mRNA enriched at cell  
621 membranes (localized) or homogenously distributed through the cell (unlocalized) for 2-cell, 4-  
622 cell, and 8-cell embryos subjected to the indicated treatments.

623  
624 **Figure 3: *erm-1* mRNA localization to the cell membrane is mRNA coding sequence**  
625 **independent. (A)** Schematic depictions comparing wild-type *erm-1* mRNA (magenta) to the re-  
626 coded, *synonymous erm-1* mRNA (green). **(B)** smFISH micrographs of 4-cell staged *C. elegans*  
627 embryos imaging wild-type *erm-1* (magenta) and the re-coded, *synonymous erm-1* mRNA (*erm-1*  
628 *synon. mRNA*, green). GFP tagged *erm-1* control 4-cell embryo (left) and MosSCI GFP  
629 tagged *synonymous erm-1* 4-cell embryo (right). DNA (DAPI, blue) and membranes marked by  
630 ERM-1::GFP are also shown. Scale bars 10  $\mu\text{m}$ . **(C)** Total number of *erm-1 wt* and *erm-1*  
631 *synonymous mRNA* molecules detected in *erm-1::gfp* (endogenous) ( $n = 9$ ). Significance  
632 indicates *P*-values derived from Welch Two Sample *t*-tests comparing the total number of *erm-1*  
633 molecules detected by the *erm-1 wt* probe vs the *erm-1 synonymous* probe in the endogenously  
634 tagged *erm-1::gfp* background. **(D)** Quantification of endogenous and *synonymous erm-1*  
635 mRNA ( $n = 6$ ) indicating the normalized frequency of mRNAs within binned, percentile distances  
636 from the cell membrane counted and normalized against the total volume of each cell.  
637 Significance indicates *P*-values derived from Welch Two Sample *t*-tests comparing the cell  
638 membrane localization of endogenous and *synonymous erm-1* mRNA in the *erm-1 synon::gfp*  
639 transgenic background. *P* value legend: NS>0.05; \*\*\*>0.00005

640

641

642 **Figure 4: PIP<sub>2</sub> binding is required for *erm-1* mRNA and ERM-1 protein localization in early**

643 **and late embryos. (A)** Schematic model of the ERM-1 protein showing the N-terminal FERM

644 domain (purple) containing the conserved PIP<sub>2</sub> – membrane binding region (PH-like, pink) and

645 C-terminal conserved C-ERMAD actin-binding domain (orange). **(B)** smFISH micrographs of 4-

646 cell and 2.5-fold embryos displaying *erm-1* mRNA and ERM-1 protein localization in *erm-1::gfp*,

647 *erm-1[T544A]:gfp*, and *erm-1[4KN]:GFP* backgrounds. Scale bars 10 μm. **(C)** *erm-1* mRNA

648 abundance does not significantly differ between *erm-1::gfp*, *erm-1[T544A]:gfp*, and *erm-*

649 *1[4KN]:GFP* expressing strains. *P*-values derived from Welch Two Sample *t*-tests comparing

650 the number of *erm-1* mRNA molecules detected in the *erm-1::gfp*, *erm-1[T544A]:gfp*, and *erm-*

651 *1[4KN]:GFP* expressing strains. *P* value legend: NS>0.05.

652

653

654 **Figure 5: FERM and PH domain-containing, maternally-inherited transcripts display**

655 **mRNA patterning. (A)** smFISH micrographs of 4-cell embryos imaging two FERM domain

656 containing transcripts, *frm-4*, *unc-112*, (magenta, left) and two PH-domain containing transcripts

657 *ani-1*, *ani-2* (magenta, right). *frm-4* mRNA and *ani-1* mRNA (top) were imaged in a PH::GFP

658 membrane marker transgenic background (membranes, green). *unc-112* mRNA and *ani-12*

659 mRNA (bottom) were imaged in the GLH-1::GFP P granule marker strain (P granules, green).

660 DNA (DAPI, blue). Scale bars 10 μm.

661

662

663 **Figure 6: Model of translation-dependent *erm-1* mRNA localization in the early *C. elegans***

664 **embryo. *erm-1* mRNA is localized in a translation-dependent manner requiring the intact RNC**

665 **and PIP<sub>2</sub>-binding region of the FERM domain.**

666

667

668 **Table 1: FERM and PH domain-containing, maternally inherited transcripts screened for**

669 **subcellular localization patterns.** Seventeen transcripts containing either FERM domain or

670 PH-like domains were selected from known maternally inherited mRNAs (Osborne Nishimura et

671 al., 2015, Tintori et al., 2016). Cell enrichment at the 4-cell stage from scRNA-seq data is

672 shown. Transcript localization is briefly described.

673



674 **REFERENCES**

675  
676

677 Aoki, S. T., Lynch, T. R., Crittenden, S. L., Bingman, C. A., Wickens, M. and Kimble, J. (2021).  
678 *C. elegans* germ granules require both assembly and localized regulators for mRNA  
679 repression. *Nat Commun* 12, 996.

680 Ast, T., Cohen, G. and Schuldiner, M. (2013). A network of cytosolic factors targets SRP-  
681 independent proteins to the endoplasmic reticulum. *Cell* 152, 1134–1145.

682 Azzam, M. E. and Algranati, I. D. (1973). Mechanism of Puromycin Action: Fate of Ribosomes  
683 after Release of Nascent Protein Chains from Polysomes. *Proceedings of the National*  
684 *Academy of Sciences of the United States of America* 70, 3866–3869.

685 Barret, C., Roy, C., Montcourrier, P., Mangeat, P. and Niggli, V. (2000). Mutagenesis of the  
686 Phosphatidylinositol 4,5-Bisphosphate (Pip2) Binding Site in the Nh2-Terminal Domain of  
687 Ezrin Correlates with Its Altered Cellular Distribution. *J Cell Biology* 151, 1067–1080.

688 Berset, C., Trachsel, H. and Altmann, M. (1998). The TOR (target of rapamycin) signal  
689 transduction pathway regulates the stability of translation initiation factor eIF4G in the yeast  
690 *Saccharomyces cerevisiae*. *Proc National Acad Sci* 95, 4264–4269.

691 Besse, F. and Ephrussi, A. (2008). Translational control of localized mRNAs: restricting protein  
692 synthesis in space and time. *Nat Rev Mol Cell Bio* 9, 971–980.

693 Brenner, S. (1974). THE GENETICS OF CAENORHABDITIS ELEGANS. *Genetics* 77, 71–94.

694 Bretscher, A. (1983). Purification of an 80,000-dalton protein that is a component of the isolated  
695 microvillus cytoskeleton, and its localization in nonmuscle cells. *The Journal of cell biology*  
696 97, 425–432.

697 Broadus, J., Fuerstenberg, S. and Doe, C. Q. (1998). Stufen-dependent localization of prospero  
698 mRNA contributes to neuroblast daughter-cell fate. *Nature* 391, 792–795.

699 Carreno, S., Kouranti, I., Glusman, E. S., Fuller, M. T., Echard, A. and Payre, F. (2008). Moesin  
700 and its activating kinase Slik are required for cortical stability and microtubule organization in  
701 mitotic cells. *J Cell Biology* 180, 739–746.

702 Carvalho, A., Olson, S. K., Gutierrez, E., Zhang, K., Noble, L. B., Zanin, E., Desai, A.,  
703 Groisman, A. and Oegema, K. (2011). Acute Drug Treatment in the Early *C. elegans* Embryo.  
704 *PLoS ONE* 6, e24656.

705 Chouaib, R., Safieddine, A., Pichon, X., Imbert, A., Kwon, O. S., Samacoits, A., Traboulsi, A.-  
706 M., Robert, M.-C., Tsanov, N., Coleno, E., et al. (2020). A Dual Protein-mRNA Localization

- 707 Screen Reveals Compartmentalized Translation and Widespread Co-translational RNA  
708 Targeting. *Developmental Cell* 54, 773-791.e5.
- 709 Cohen, M. J., Chirico, W. J. and Lipke, P. N. (2020). Through the back door: Unconventional  
710 protein secretion. *Cell Surf* 6, 100045.
- 711 Corish, P. and Tyler-Smith, C. (1999). Attenuation of green fluorescent protein half-life in  
712 mammalian cells. *Protein Eng Des Sel* 12, 1035–1040.
- 713 Cuesta, R., Laroia, G. and Schneider, R. J. (2000). Chaperone hsp27 inhibits translation during  
714 heat shock by binding eIF4G and facilitating dissociation of cap-initiation complexes. *Genes  
715 & development* 14, 1460–1470.
- 716 Das, S., Vera, M., Gandin, V., Singer, R. H. and Tutucci, E. (2021). Intracellular mRNA  
717 transport and localized translation. *Nat Rev Mol Cell Bio* 22, 483–504.
- 718 Duncan, R. and Hershey, J. W. (1984). Heat shock-induced translational alterations in HeLa  
719 cells. Initiation factor modifications and the inhibition of translation. *J Biological Chem* 259,  
720 11882–9.
- 721 Engel, K. L., Arora, A., Goering, R., Lo, H. G. and Taliaferro, J. M. (2020). Mechanisms and  
722 consequences of subcellular RNA localization across diverse cell types. *Traffic* 21, 404–418.
- 723 Ephrussi, A., Dickinson, L. K. and Lehmann, R. (1991). oskar organizes the germ plasm and  
724 directs localization of the posterior determinant nanos. *Cell* 66, 37–50.
- 725 Fehon, R. G., McClatchey, A. I. and Bretscher, A. (2010). Organizing the cell cortex: the role of  
726 ERM proteins. *Nat Rev Mol Cell Bio* 11, 276–287.
- 727 Femino, A. M., Fay, F. S., Fogarty, K. and Singer, R. H. (1998). Visualization of single RNA  
728 transcripts in situ. *Science* 280, 585–590.
- 729 Fraser, A. G., Kamath, R. S., Zipperlen, P., Martinez-Campos, M., Sohrmann, M. and Ahringer,  
730 J. (2000). Functional genomic analysis of *C. elegans* chromosome I by systematic RNA  
731 interference. *Nature* 408, 325–330.
- 732 Frohnhöfer, H. G. and Nüsslein-Volhard, C. (1986). Organization of anterior pattern in the  
733 *Drosophila* embryo by the maternal gene bicoid. *Nature* 324, 120–125.
- 734 Furden, D. van, Johnson, K., Segbert, C. and Bossinger, O. (2004). The *C. elegans* ezrin-radixin-  
735 moesin protein ERM-1 is necessary for apical junction remodelling and tubulogenesis in the  
736 intestine. *Dev Biol* 272, 262–276.
- 737 Göbel, V., Barrett, P. L., Hall, D. H. and Fleming, J. T. (2004). Lumen Morphogenesis in *C.*  
738 *elegans* Requires the Membrane-Cytoskeleton Linker erm-1. *Dev Cell* 6, 865–873.

- 739 Hirashima, T., Tanaka, R., Yamaguchi, M. and Yoshida, H. (2018). The ABD on the nascent  
740 polypeptide and PH domain are required for the precise Anillin localization in *Drosophila*  
741 syncytial blastoderm. *Scientific Reports* 8, 12910.
- 742 Hunt-Newbury, R., Viveiros, R., Johnsen, R., Mah, A., Anastas, D., Fang, L., Halfnight, E., Lee,  
743 D., Lin, J., Lorch, A., et al. (2007). High-Throughput In Vivo Analysis of Gene Expression in  
744 *Caenorhabditis elegans*. *Plos Biol* 5, e237.
- 745 Johnston, D. S. (2005). Moving messages: the intracellular localization of mRNAs. *Nature*  
746 *reviews. Molecular cell biology* 6, 363–375.
- 747 Josephson, M. P., Aliani, R., Norris, M. L., Ochs, M. E., Gujar, M. and Lundquist, E. A. (2017).  
748 The *Caenorhabditis elegans* NF2/Merlin Molecule NFM-1 Nonautonomously Regulates  
749 Neuroblast Migration and Interacts Genetically with the Guidance Cue SLT-1/Slit. *Genetics*  
750 205, 737–748.
- 751 Kaymak, E., Farley, B. M., Hay, S. A., Li, C., Ho, S., Hartman, D. J. and Ryder, S. P. (2016).  
752 Efficient generation of transgenic reporter strains and analysis of expression patterns in  
753 *Caenorhabditis elegans* using library MosSCI. *Dev Dynam* 245, 925–936.
- 754 Keenan, R. J., Freymann, D. M., Stroud, R. M. and Walter, P. (2001). THE SIGNAL  
755 RECOGNITION PARTICLE. *Annu Rev Biochem* 70, 755–775.
- 756 Kim, W., Underwood, R. S., Greenwald, I. and Shaye, D. D. (2018). OrthoList 2: A New  
757 Comparative Genomic Analysis of Human and *Caenorhabditis elegans* Genes. *Genetics* 210,  
758 445–461.
- 759 Knowles, R. B., Sabry, J. H., Martone, M. E., Deerinck, T. J., Ellisman, M. H., Bassell, G. J. and  
760 Kosik, K. S. (1996). Translocation of RNA Granules in Living Neurons. *J Neurosci* 16,  
761 7812–7820.
- 762 Kobori, T., Tameishi, M., Tanaka, C., Urashima, Y. and Obata, T. (2021). Subcellular  
763 distribution of ezrin/radixin/moesin and their roles in the cell surface localization and  
764 transport function of P-glycoprotein in human colon adenocarcinoma LS180 cells. *Plos One*  
765 16, e0250889.
- 766 Lankes, W. T. and Furthmayr, H. (1991). Moesin: a member of the protein 4.1-talin-ezrin family  
767 of proteins. *Proceedings of the National Academy of Sciences* 88, 8297–8301.
- 768 Lécuyer, E., Yoshida, H., Parthasarathy, N., Alm, C., Babak, T., Cerovina, T., Hughes, T. R.,  
769 Tomancak, P. and Krause, H. M. (2007). Global Analysis of mRNA Localization Reveals a  
770 Prominent Role in Organizing Cellular Architecture and Function. *Cell* 131, 174–187.
- 771 Lee, C.-Y. S., Putnam, A., Lu, T., He, S., Ouyang, J. P. T. and Seydoux, G. (2020). Recruitment  
772 of mRNAs to P granules by condensation with intrinsically-disordered proteins. *eLife* 9,.

- 773 Li, X., Zhao, X., Fang, Y., Jiang, X., Duong, T., Fan, C., Huang, C. C. and Kain, S. R. (1998).  
774 Generation of destabilized green fluorescent protein as a transcription reporter. *The Journal of*  
775 *biological chemistry* 273, 34970–34975.
- 776 Li, Q., Nance, M. R., Kulikauskas, R., Nyberg, K., Fehon, R., Karplus, P. A., Bretscher, A. and  
777 Tesmer, J. J. G. (2007). Self-masking in an intact ERM-merlin protein: an active role for the  
778 central alpha-helical domain. *Journal of molecular biology* 365, 1446–1459.
- 779 Li, Z., Zhang, P., Zhang, R., Wang, X., Tse, Y. C. and Zhang, H. (2021). A collection of toolkit  
780 strains reveals distinct localization and dynamics of membrane-associated transcripts in  
781 epithelia. *Cell Reports* 35, 109072.
- 782 Llopis, P. M., Jackson, A. F., Sliusarenko, O., Surovtsev, I., Heinritz, J., Emonet, T. and Jacobs-  
783 Wagner, C. (2010). Spatial organization of the flow of genetic information in bacteria. *Nature*  
784 466, 77–81.
- 785 Long, R. M., Singer, R. H., Meng, X., Gonzalez, I., Nasmyth, K. and Jansen, R.-P. (1997).  
786 Mating Type Switching in Yeast Controlled by Asymmetric Localization of ASH1 mRNA.  
787 *Science* 277, 383–387.
- 788 Ma, W. and Mayr, C. (2018). A Membraneless Organelle Associated with the Endoplasmic  
789 Reticulum Enables 3'UTR-Mediated Protein-Protein Interactions. *Cell* 175, 1492-1506.e19.
- 790 Maddox, A. S., Habermann, B., Desai, A. and Oegema, K. (2005). Distinct roles for two C.  
791 elegans anillins in the gonad and early embryo. *Development* 132, 2837–2848.
- 792 McClatchey, A. I. (2003). Merlin and ERM proteins: unappreciated roles in cancer development?  
793 *Nat Rev Cancer* 3, 877–883.
- 794 McClatchey, A. I. (2014). ERM proteins at a glance. *J Cell Sci* 127, 3199–3204.
- 795 Mueller, F., Senecal, A., Tantale, K., Marie-Nelly, H., Ly, N., Collin, O., Basyuk, E., Bertrand,  
796 E., Darzacq, X. and Zimmer, C. (2013). FISH-quant: automatic counting of transcripts in 3D  
797 FISH images. *Nature Methods* 10, 277–278.
- 798 Nishimura, E. O., Zhang, J. C., Werts, A. D., Goldstein, B. and Lieb, J. D. (2015). Asymmetric  
799 Transcript Discovery by RNA-seq in C. elegans Blastomeres Identifies neg-1, a Gene  
800 Important for Anterior Morphogenesis. *Plos Genet* 11, e1005117.
- 801 Olson, S. K., Greenan, G., Desai, A., Müller-Reichert, T. and Oegema, K. (2012). Hierarchical  
802 assembly of the eggshell and permeability barrier in C. elegans. *The Journal of Cell Biology*  
803 198, 731–748.
- 804 Ouyang, W., Mueller, F., Hjelmare, M., Lundberg, E. and Zimmer, C. (2019). ImJoy: an open-  
805 source computational platform for the deep learning era. *arxiv*.

- 806 Parker, D. M., Winkenbach, L. P., Boyson, S. P., Saxton, M. N., Daidone, C., Al-Mazaydeh, Z.  
807 A., Nishimura, M. T., Mueller, F. and Nishimura, E. O. (2020). mRNA localization is linked  
808 to translation regulation in the *Caenorhabditis elegans* germ lineage. *Development*  
809 2020.01.09.900498.
- 810 Parker, D. M., Winkenbach, L. P., Parker, A., Boyson, S. and Nishimura, E. O. (2021). Improved  
811 Methods for Single-Molecule Fluorescence In Situ Hybridization and Immunofluorescence  
812 in *Caenorhabditis elegans* Embryos. *Curr Protoc* 1, e299.
- 813 Parton, R. M., Davidson, A., Davis, I. and Weil, T. T. (2014). Subcellular mRNA localisation at  
814 a glance. *Journal of Cell Science* 127, 2127 LP – 2133.
- 815 Pearson, M. A., Reczek, D., Bretscher, A. and Karplus, P. A. (2000). Structure of the ERM  
816 protein moesin reveals the FERM domain fold masked by an extended actin binding tail  
817 domain. *Cell* 101, 259–270.
- 818 Piekny, A. J., Johnson, J.-L. F., Cham, G. D. and Mains, P. E. (2003). The *Caenorhabditis*  
819 *elegans* nonmuscle myosin genes *nmy-1* and *nmy-2* function as redundant components of the  
820 *let-502*/Rho-binding kinase and *mel-11*/myosin phosphatase pathway during embryonic  
821 morphogenesis. *Development* 130, 5695–5704.
- 822 Raj, A. and Tyagi, S. *Detection of individual endogenous RNA transcripts in situ using multiple*  
823 *singly labeled probes*. 1st ed. Elsevier Inc.
- 824 Raj, A., Bogaard, P. van den, Rifkin, S. A., Oudenaarden, A. van and Tyagi, S. (2008). Imaging  
825 individual mRNA molecules using multiple singly labeled probes. *Nature Methods* 5, 877–  
826 879.
- 827 Ramalho, J. J., Sepers, J. J., Nicolle, O., Schmidt, R., Cravo, J., Michaux, G. and Boxem, M.  
828 (2020). C-terminal phosphorylation modulates ERM-1 localization and dynamics to control  
829 cortical actin organization and support lumen formation during *Caenorhabditis elegans*  
830 development. *Development* 147, dev188011.
- 831 Ramírez-Valle, F., Braunstein, S., Zavadil, J., Formenti, S. C. and Schneider, R. J. (2008).  
832 eIF4GI links nutrient sensing by mTOR to cell proliferation and inhibition of autophagy. *J*  
833 *Cell Biology* 181, 293–307.
- 834 Rebagliati, M. R., Weeks, D. L., Harvey, R. P. and Melton, D. A. (1985). Identification and  
835 cloning of localized maternal RNAs from xenopus eggs. *Cell* 42, 769–777.
- 836 Roch, F., Polesello, C., Roubinet, C., Martin, M., Roy, C., Valenti, P., Carreno, S., Mangeat, P.  
837 and Payre, F. (2010). Differential roles of PtdIns(4,5)P<sub>2</sub> and phosphorylation in moesin  
838 activation during *Drosophila* development. *J Cell Sci* 123, 2058–2067.
- 839 Rogalski, T. M., Mullen, G. P., Gilbert, M. M., Williams, B. D. and Moerman, D. G. (2000). The  
840 UNC-112 Gene in *Caenorhabditis elegans* Encodes a Novel Component of Cell-Matrix



- 841 Adhesion Structures Required for Integrin Localization in the Muscle Cell Membrane. *J Cell*  
842 *Biology* 150, 253–264.
- 843 Rogers, A. N., Chen, D., McColl, G., Czerwieńiec, G., Felkey, K., Gibson, B. W., Hubbard, A.,  
844 Melov, S., Lithgow, G. J. and Kapahi, P. (2011). Life span extension via eIF4G inhibition is  
845 mediated by posttranscriptional remodeling of stress response gene expression in *C. elegans*.  
846 *Cell metabolism* 14, 55–66.
- 847 Ryder, P. V. and Lerit, D. A. (2018). RNA localization regulates diverse and dynamic cellular  
848 processes. *Traffic* 19, 496–502.
- 849 Safieddine, A., Coleno, E., Salloum, S., Imbert, A., Traboulsi, A.-M., Kwon, O. S., Lionneton,  
850 F., Georget, V., Robert, M.-C., Gostan, T., et al. (2021). A choreography of centrosomal  
851 mRNAs reveals a conserved localization mechanism involving active polysome transport. *Nat*  
852 *Commun* 12, 1352.
- 853 Schindelin, J., Arganda-Carreras, I., Frise, E., Kaynig, V., Longair, M., Pietzsch, T., Preibisch,  
854 S., Rueden, C., Saalfeld, S., Schmid, B., et al. (2012). Fiji: An open-source platform for  
855 biological-image analysis. *Nature Methods* 9, 676–682.
- 856 Schneider-Poetsch, T., Ju, J., Eyler, D. E., Dang, Y., Bhat, S., Merrick, W. C., Green, R., Shen,  
857 B. and Liu, J. O. (2010). Inhibition of Eukaryotic Translation Elongation by Cycloheximide  
858 and Lactimidomycin. *Nature chemical biology* 6, 209–217.
- 859 Senju, Y., Kalimeri, M., Koskela, E. V., Somerharju, P., Zhao, H., Vattulainen, I. and  
860 Lappalainen, P. (2017). Mechanistic principles underlying regulation of the actin cytoskeleton  
861 by phosphoinositides. *Proceedings of the National Academy of Sciences* 114, E8977–E8986.
- 862 Sepulveda, G., Antkowiak, M., Brust-Mascher, I., Mahe, K., Ou, T., Castro, N. M., Christensen,  
863 L. N., Cheung, L., Jiang, X., Yoon, D., et al. (2018). Co-translational protein targeting  
864 facilitates centrosomal recruitment of PCNT during centrosome maturation in vertebrates.  
865 *eLife* 7, e34959.
- 866 Shaffer, S. M., Wu, M. T., Levesque, M. J. and Raj, A. (2013). Turbo FISH: A Method for Rapid  
867 Single Molecule RNA FISH. *PLoS ONE* 8(9), e75120.
- 868 Shalgi, R., Hurt, J. A., Krykbaeva, I., Taipale, M., Lindquist, S. and Burge, C. B. (2013).  
869 Widespread Regulation of Translation by Elongation Pausing in Heat Shock. *Mol Cell* 49,  
870 439–452.
- 871 Shaye, D. D. and Greenwald, I. (2011). OrthoList: A Compendium of *C. elegans* Genes with  
872 Human Orthologs. *Plos One* 6, e20085.
- 873 Stein, K. K. and Golden, A. (2015). The *C. elegans* eggshell. *WormBook* □: *the online review of*  
874 *C. elegans biology* 1–35.

- 875 Szostak, E. and Gebauer, F. (2013). Translational control by 3'-UTR-binding proteins. *Briefings*  
876 *in Functional Genomics* 12, 58–65.
- 877 Thompson, H. M., Skop, A. R., Euteneuer, U., Meyer, B. J. and McNiven, M. A. (2002). The  
878 Large GTPase Dynamin Associates with the Spindle Midzone and Is Required for  
879 Cytokinesis. *Curr Biol* 12, 2111–2117.
- 880 Tintori, S. C., Nishimura, E. O., Golden, P., Lieb, J. D. and Goldstein, B. (2016). A  
881 Transcriptional Lineage of the Early *C. elegans* Embryo. *Developmental cell* 38, 430–444.
- 882 Tocchini, C., Rohner, M., Guerard, L., Ray, P., Stetina, S. E. V. and Mango, S. E. (2021).  
883 Translation-dependent mRNA localization to *Caenorhabditis elegans* adherens junctions. *Dev*  
884 *Camb Engl* 148, dev200027.
- 885 Tsanov, N., Samacoits, A., Chouaib, R., Traboulsi, A.-M., Gostan, T., Weber, C., Zimmer, C.,  
886 Zibara, K., Walter, T., Peter, M., et al. (2016). smiFISH and FISH-quant – a flexible single  
887 RNA detection approach with super-resolution capability. *Nucleic Acids Res* 44, e165–e165.
- 888 Tsukita, S., Hieda, Y. and Tsukita, S. (1989). A new 82-kD barbed end-capping protein (radixin)  
889 localized in the cell-to-cell adherens junction: purification and characterization. *The Journal*  
890 *of cell biology* 108, 2369–2382.
- 891 Uchida, Y., Ogata, M., Mori, Y., Oh-hora, M., Hatano, N. and Hamaoka, T. (2002). Localization  
892 of PTP-FERM in Nerve Processes through Its FERM Domain. *Biochemical and Biophysical*  
893 *Research Communications* 292, 13–19.
- 894 Updike, D. and Strome, S. (2010). P Granule Assembly and Function in *Caenorhabditis elegans*  
895 Germ Cells. *Journal of andrology*. 31, 53–60.
- 896 Walter, P. and Johnson, A. E. (1994). Signal sequence recognition and protein targeting to the  
897 endoplasmic reticulum membrane. *Annual review of cell biology* 10, 87–119.
- 898 Zhang, X., Flores, L. R., Keeling, M. C., Sliogeryte, K. and Gavara, N. (2020). Ezrin  
899 Phosphorylation at T567 Modulates Cell Migration, Mechanical Properties, and Cytoskeletal  
900 Organization. *Int J Mol Sci* 21, 435.
- 901 Zou, W., Lu, Q., Zhao, D., Li, W., Mapes, J., Xie, Y. and Wang, X. (2009). *Caenorhabditis*  
902 *elegans* Myotubularin MTM-1 Negatively Regulates the Engulfment of Apoptotic Cells. *Plos*  
903 *Genet* 5, e1000679.

904

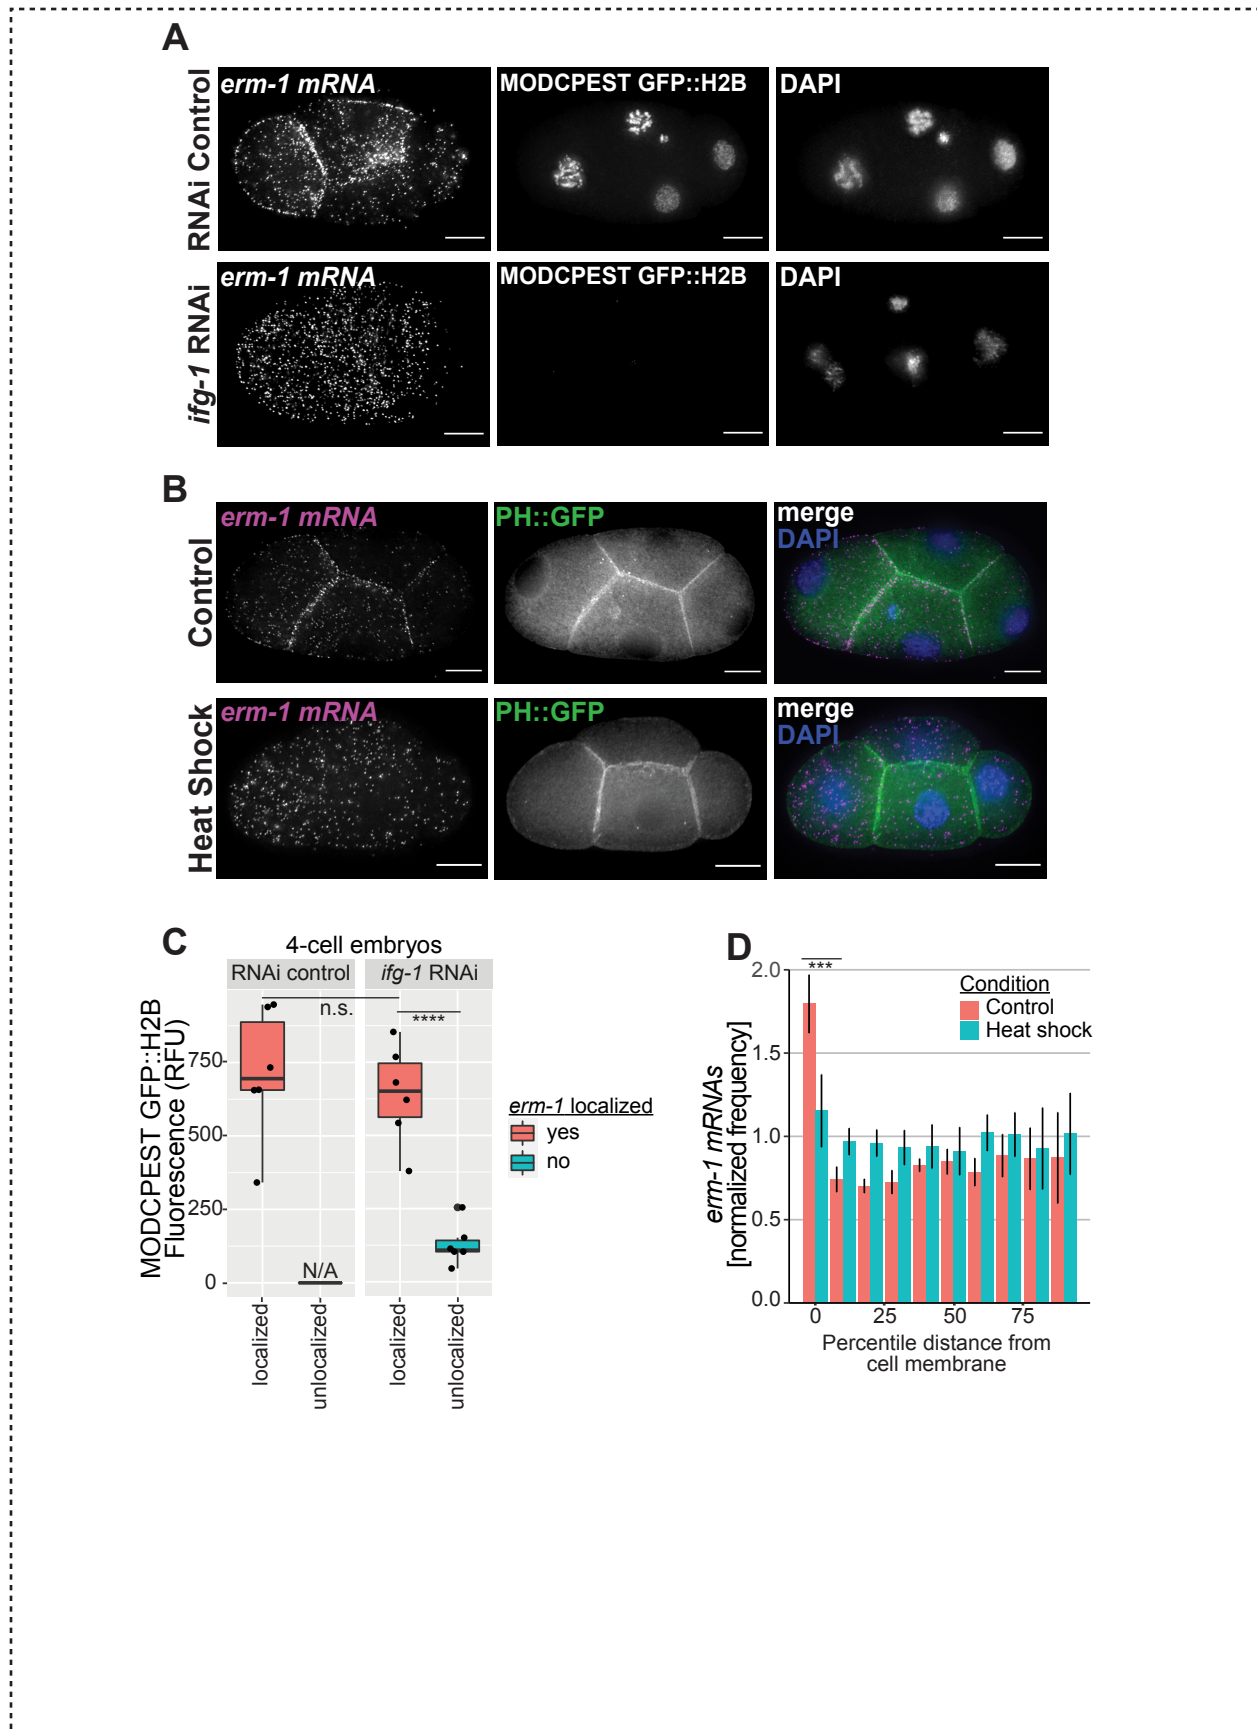



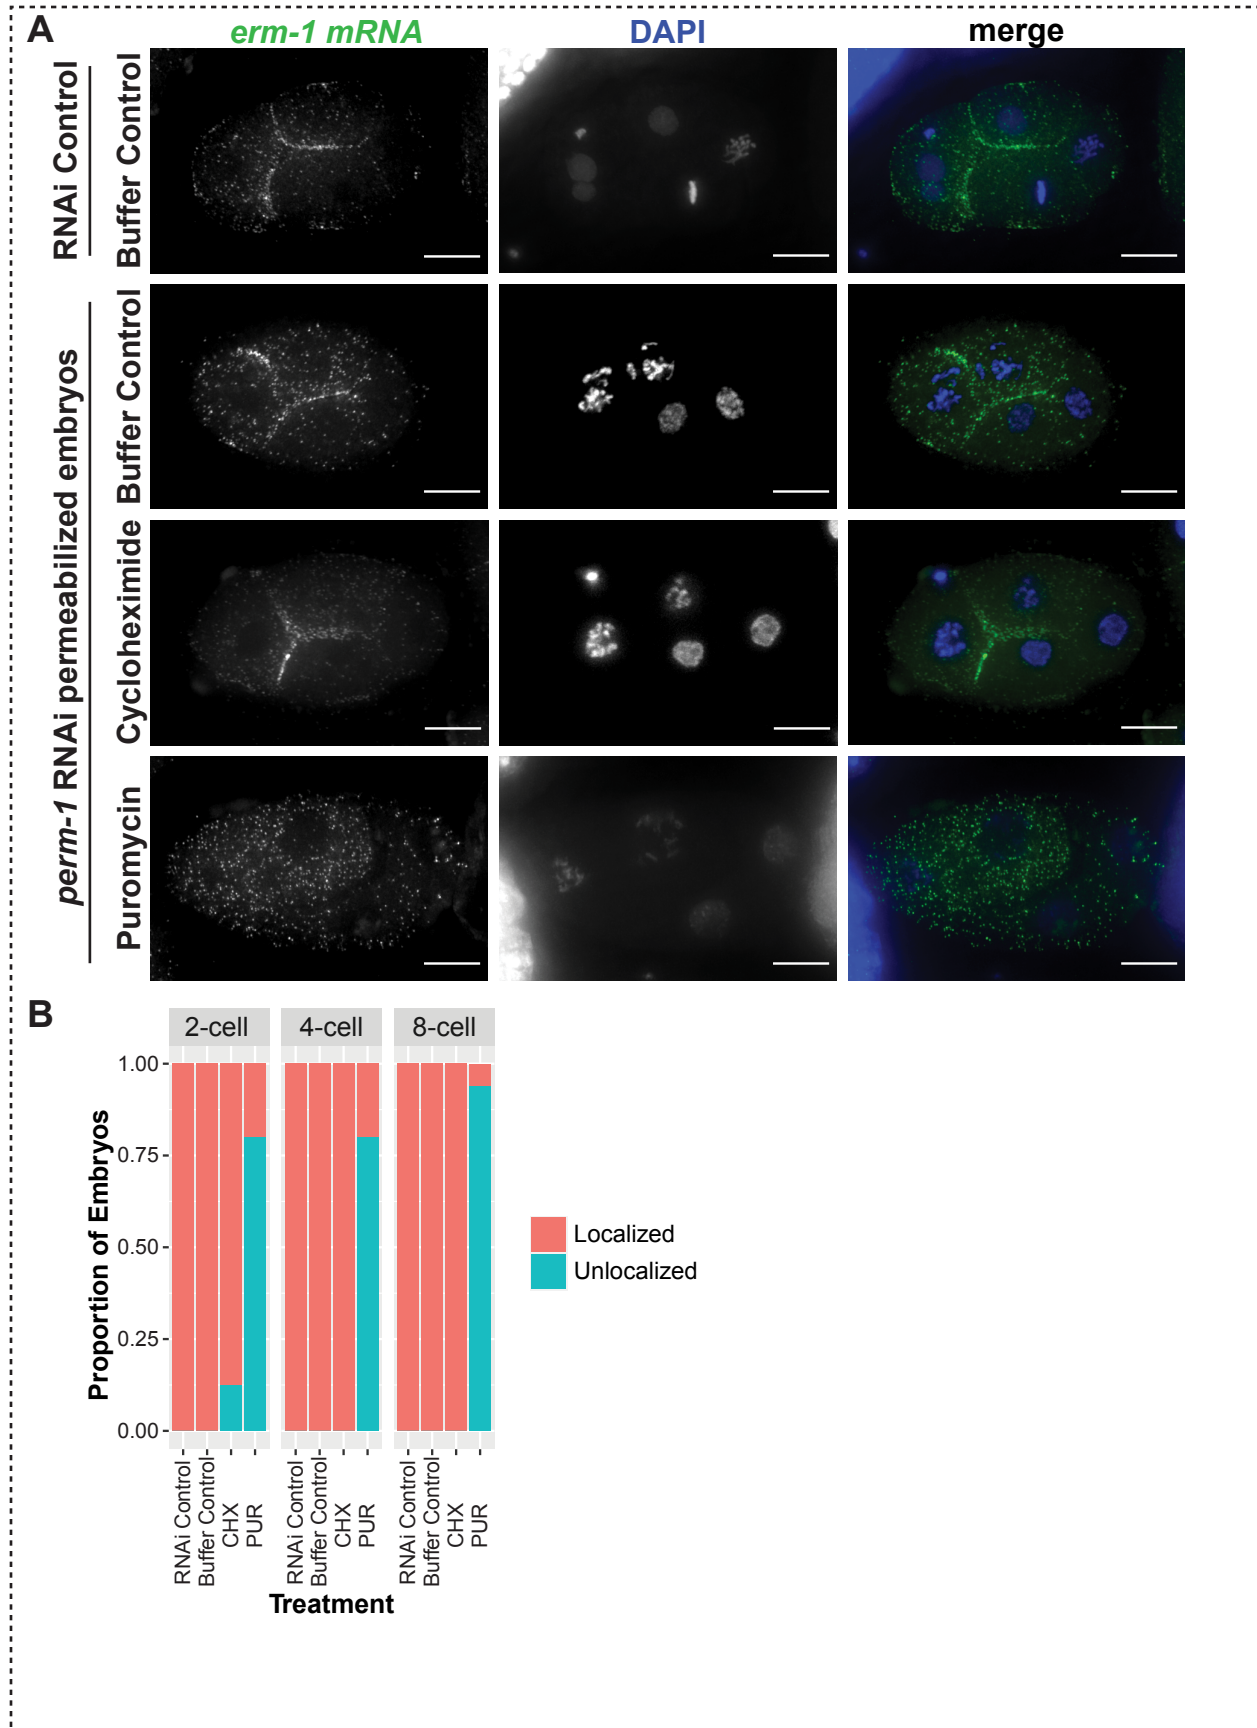

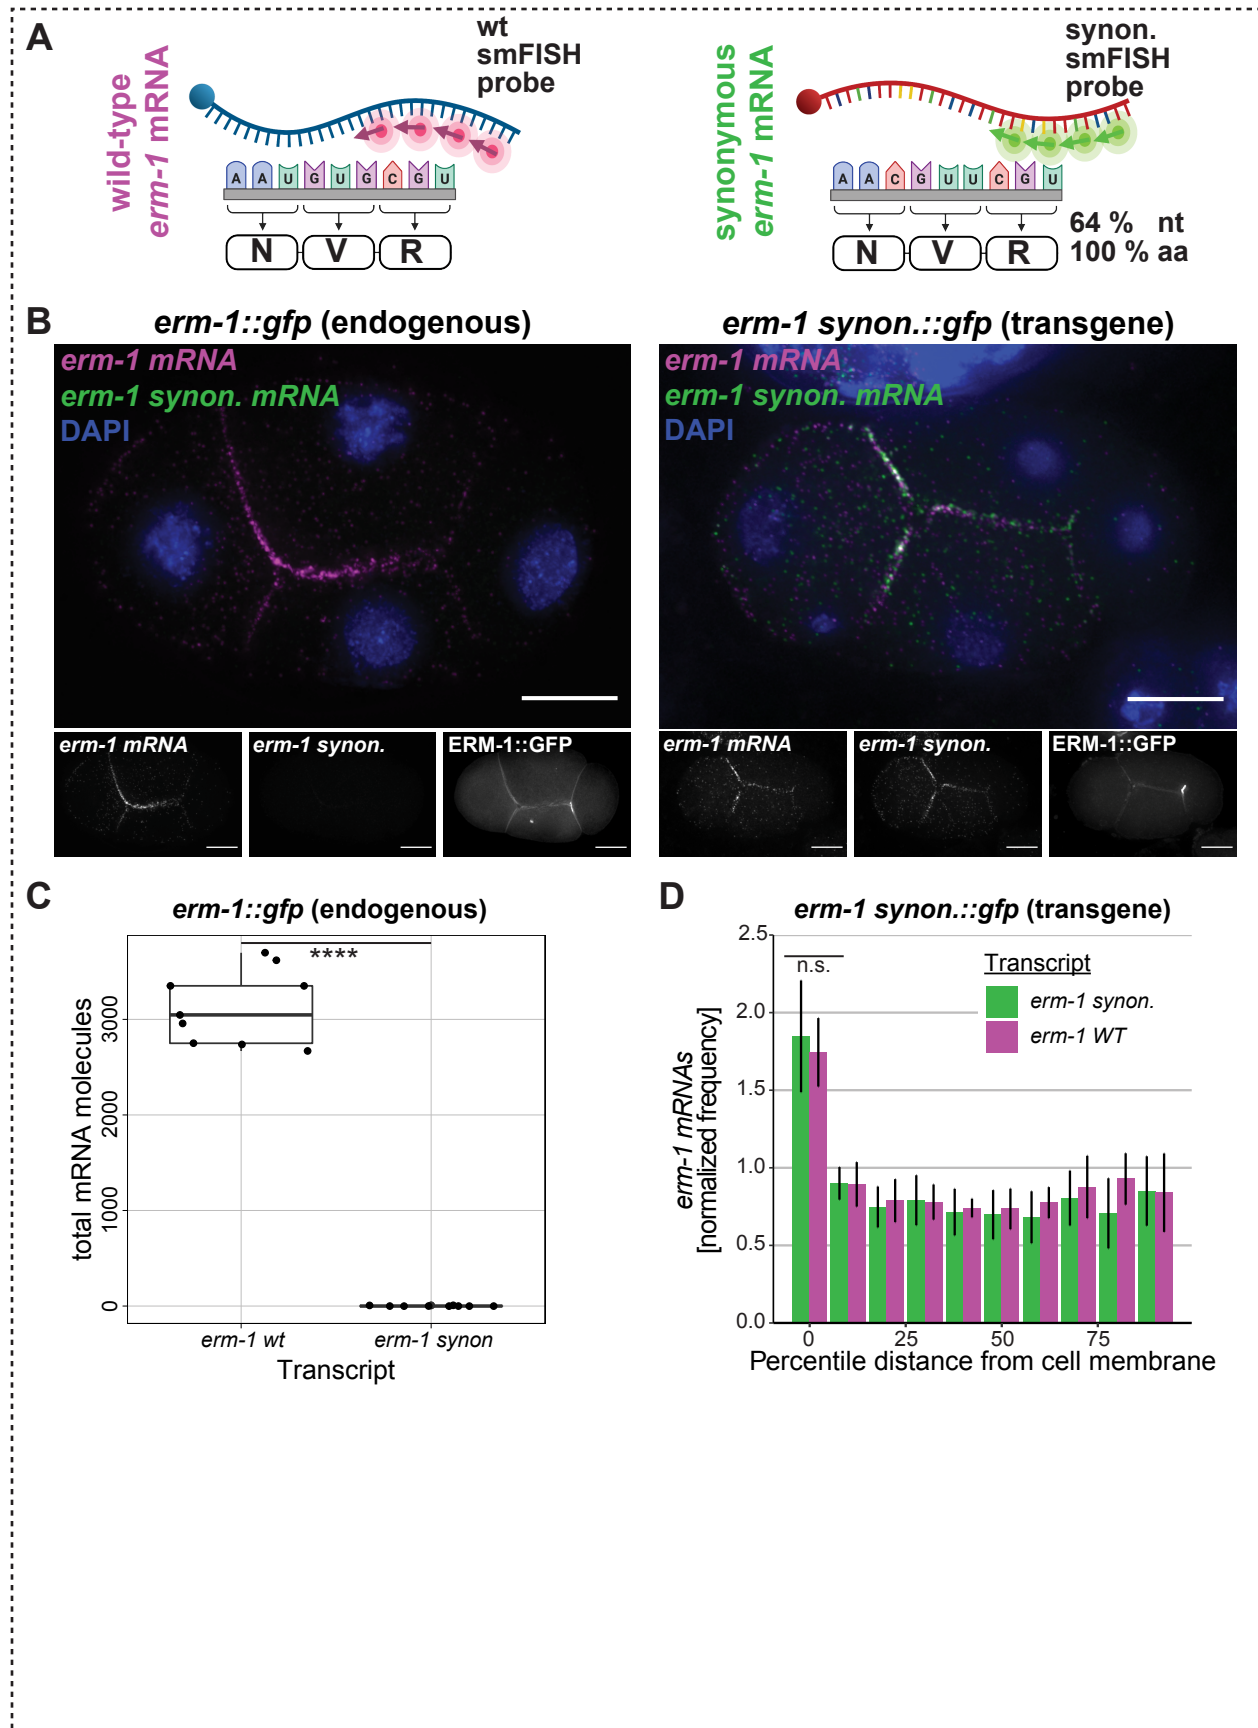

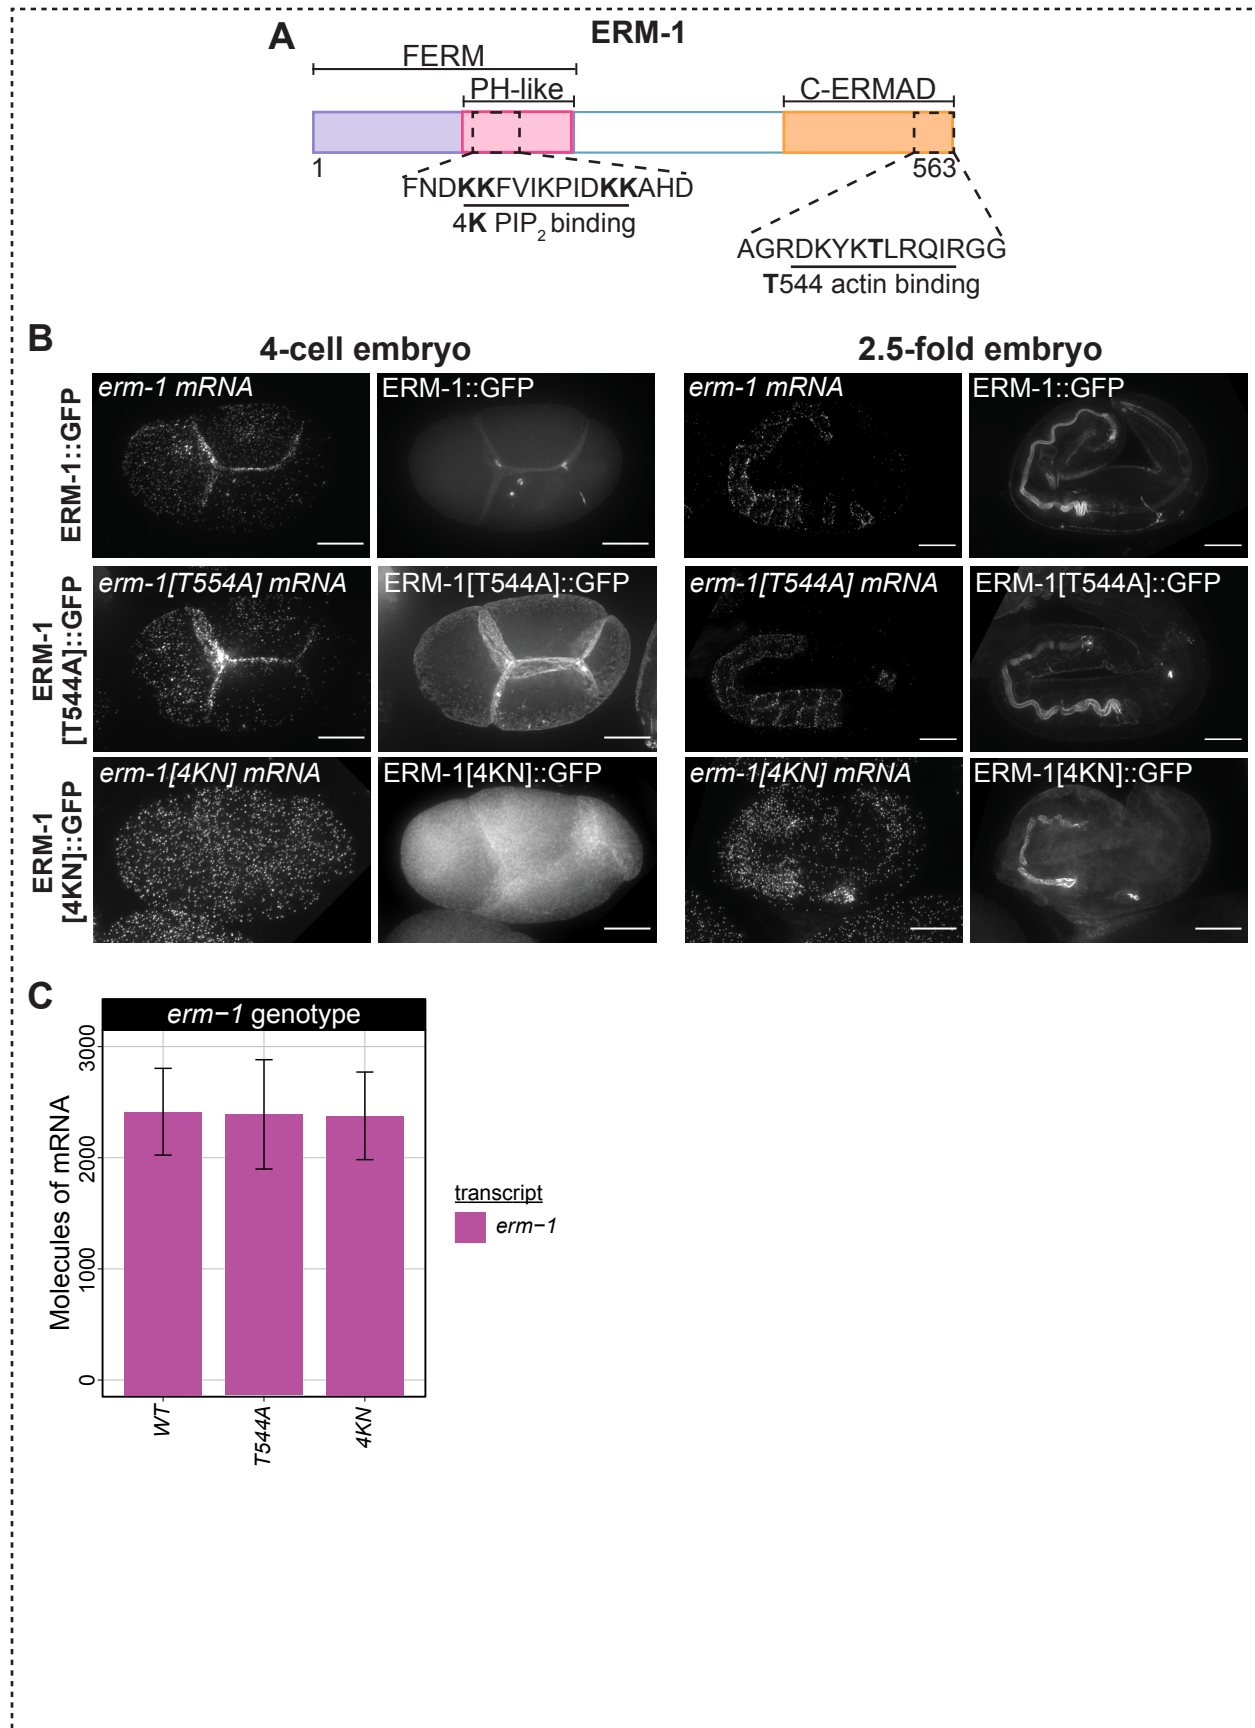

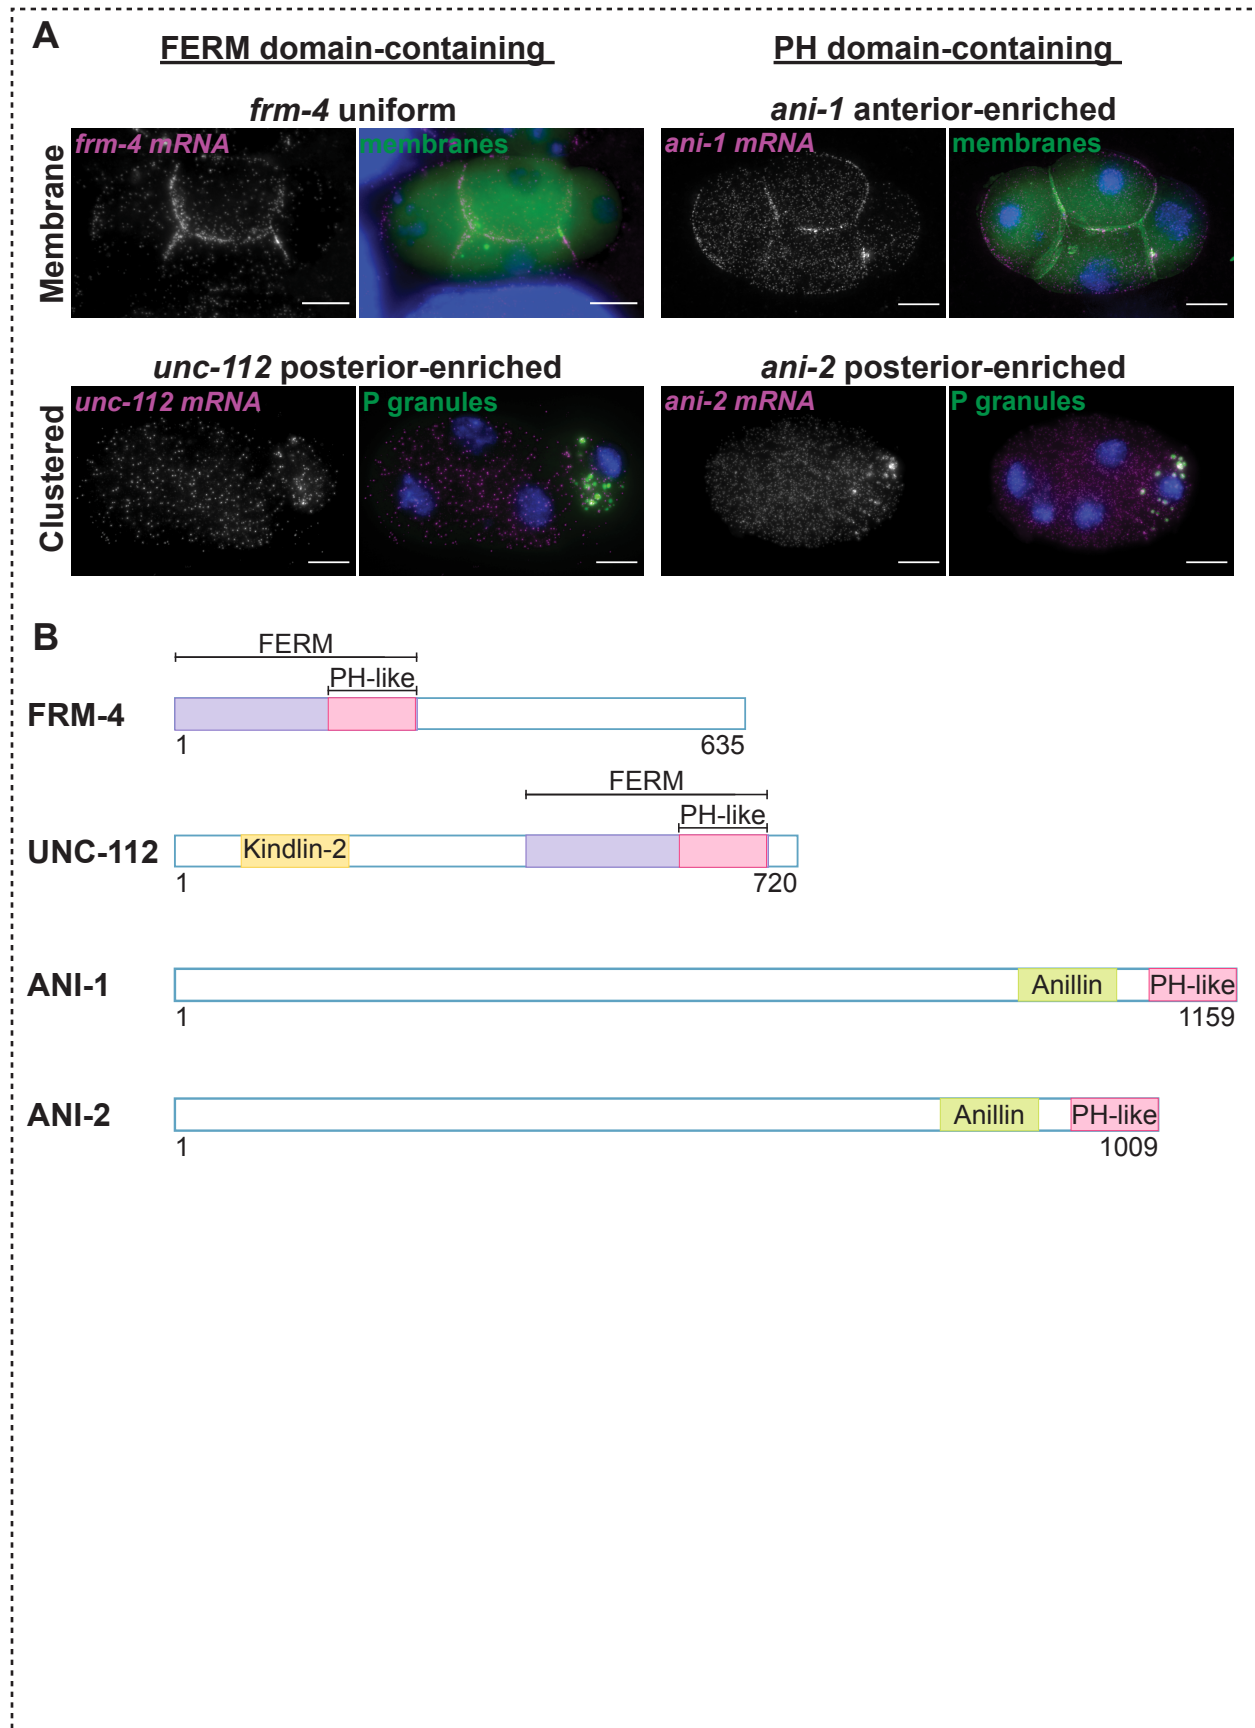

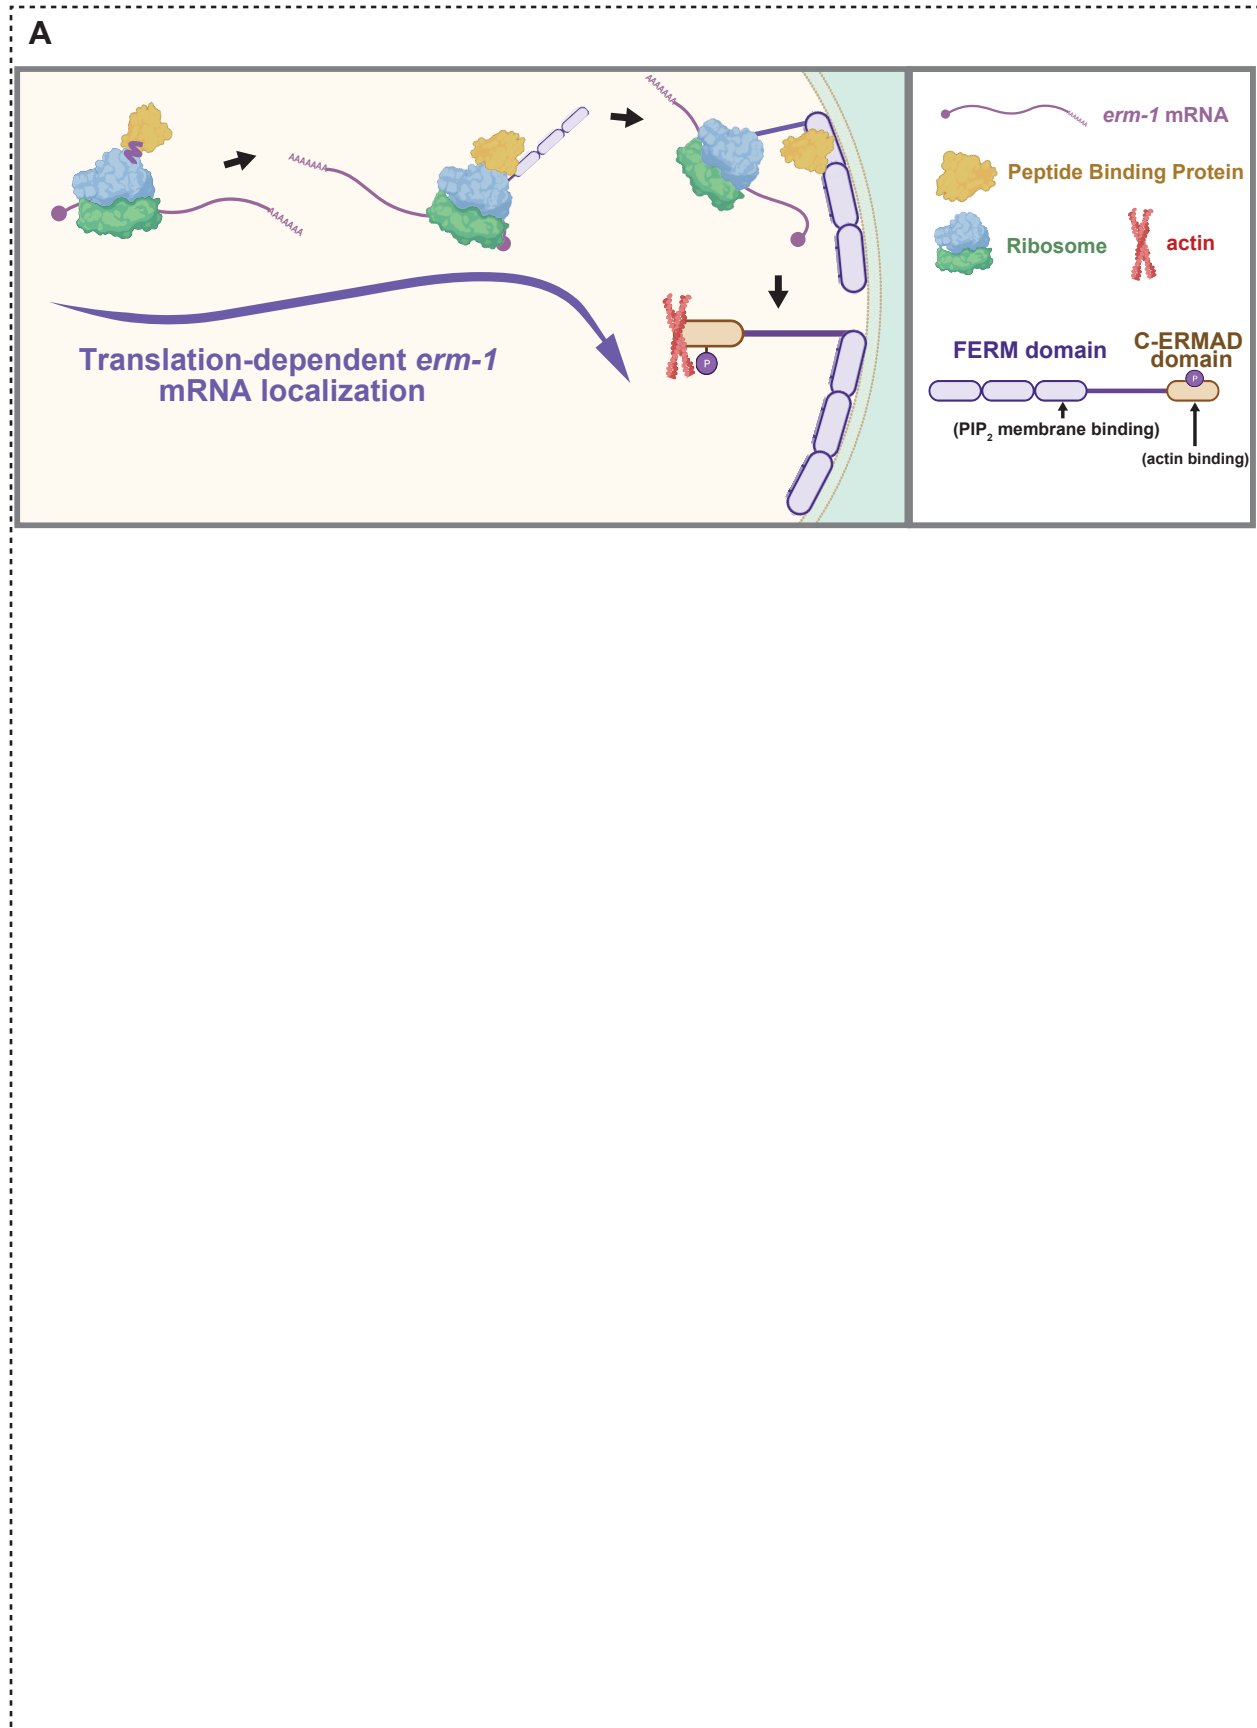

Source: https://www.biorxiv.org/content/10.1101/2022.05.11.491546v1.full.pdf
